# Supplementary material for: Class I HDAC inhibition reduces DNA damage repair capacity of MYC-amplified medulloblastoma cells
Source: Springer Nature journal article supplement (doi:10.1007/s11060-023-04445-w), 2023-09-01

Figure S1

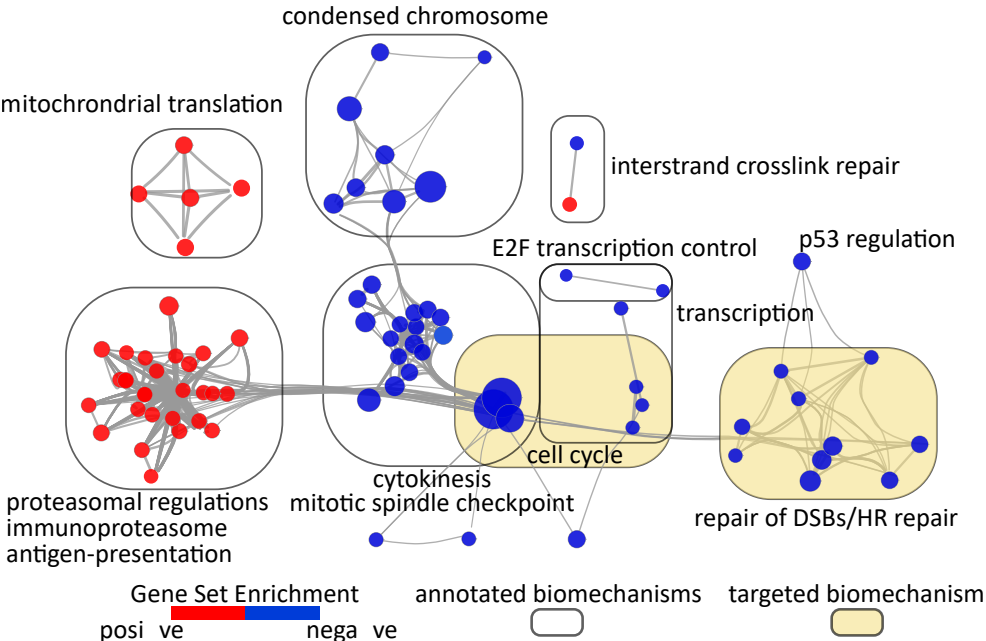

# Figure S2

## A

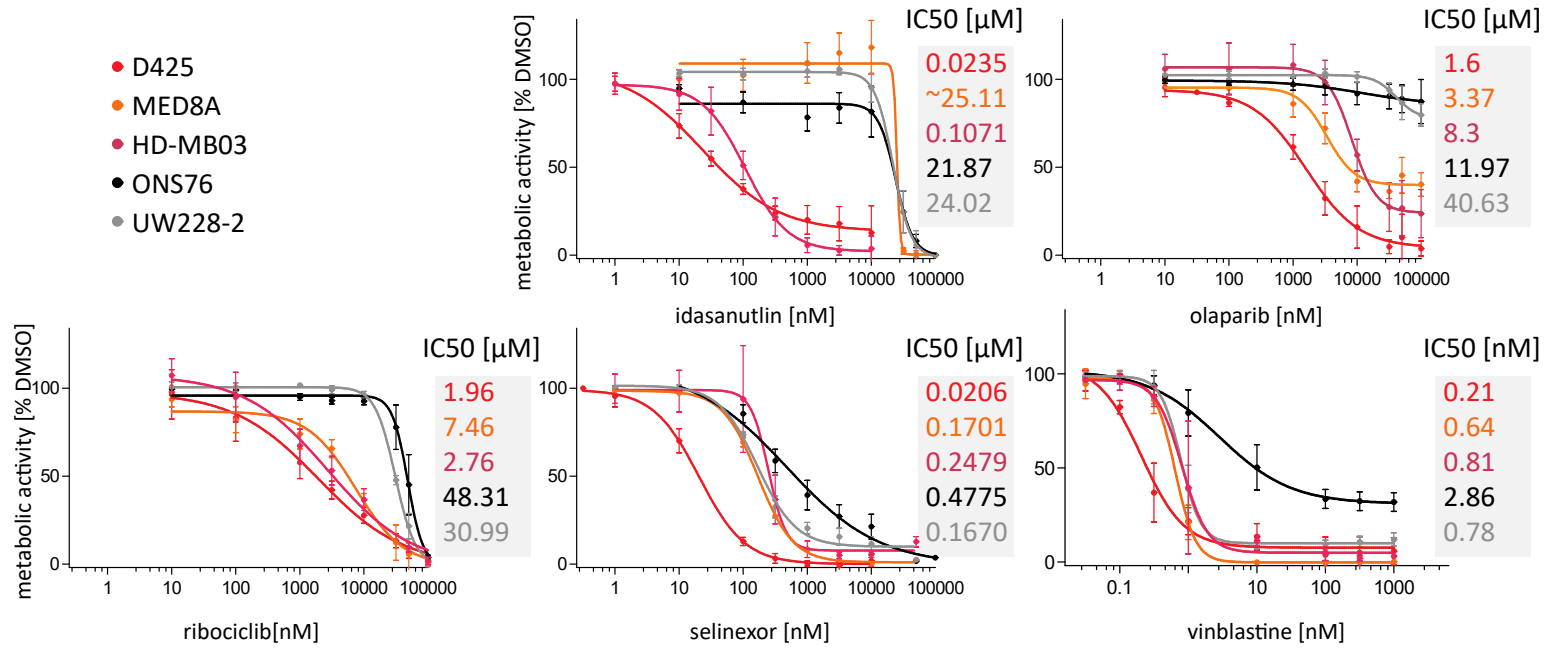

## B

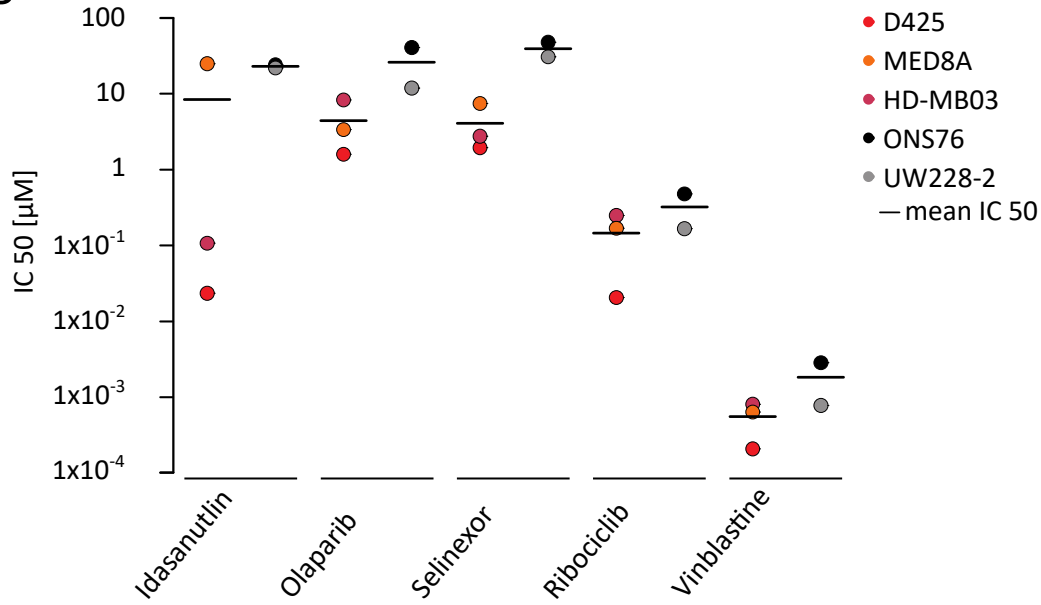

## C

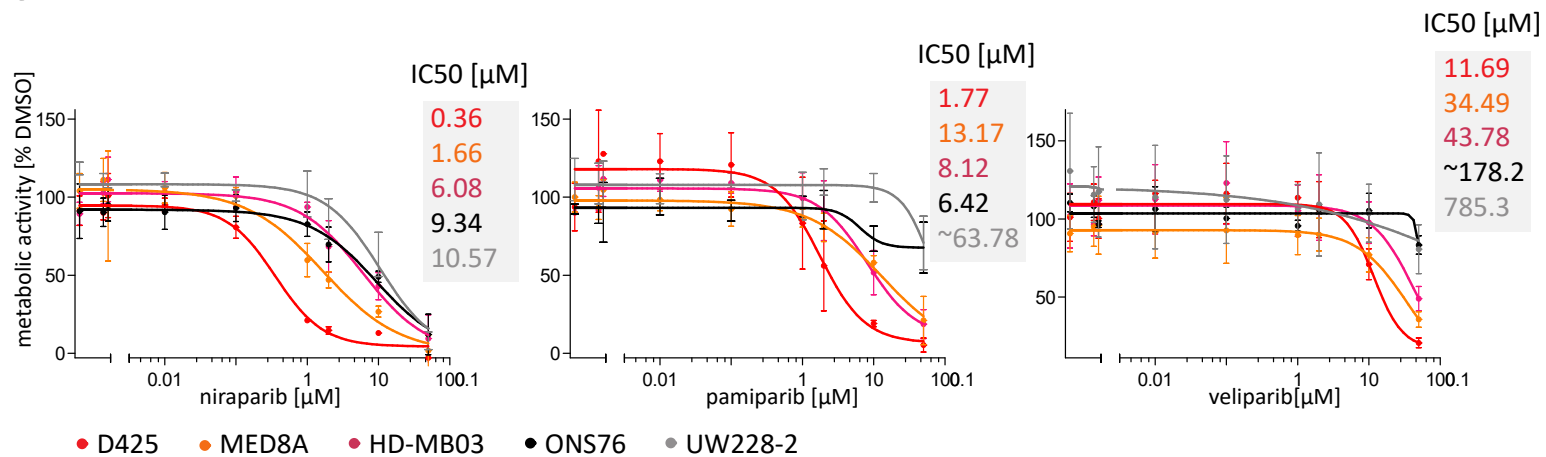

Figure S3

A

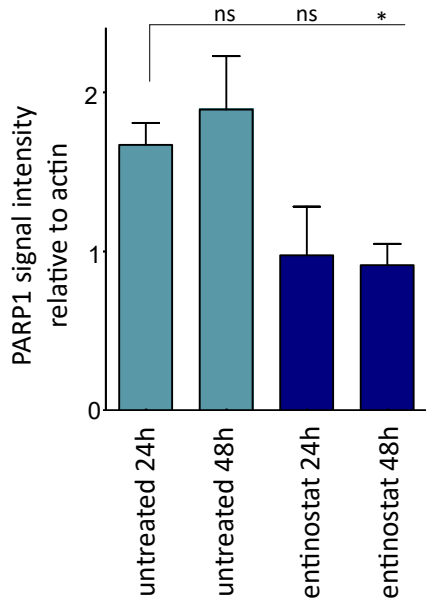

B

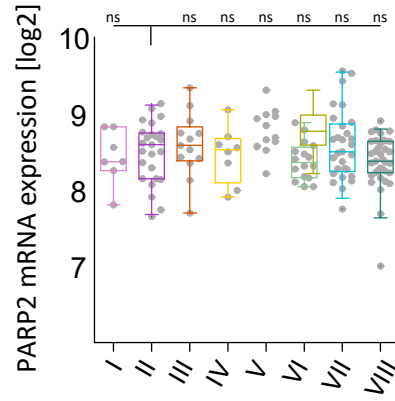

C

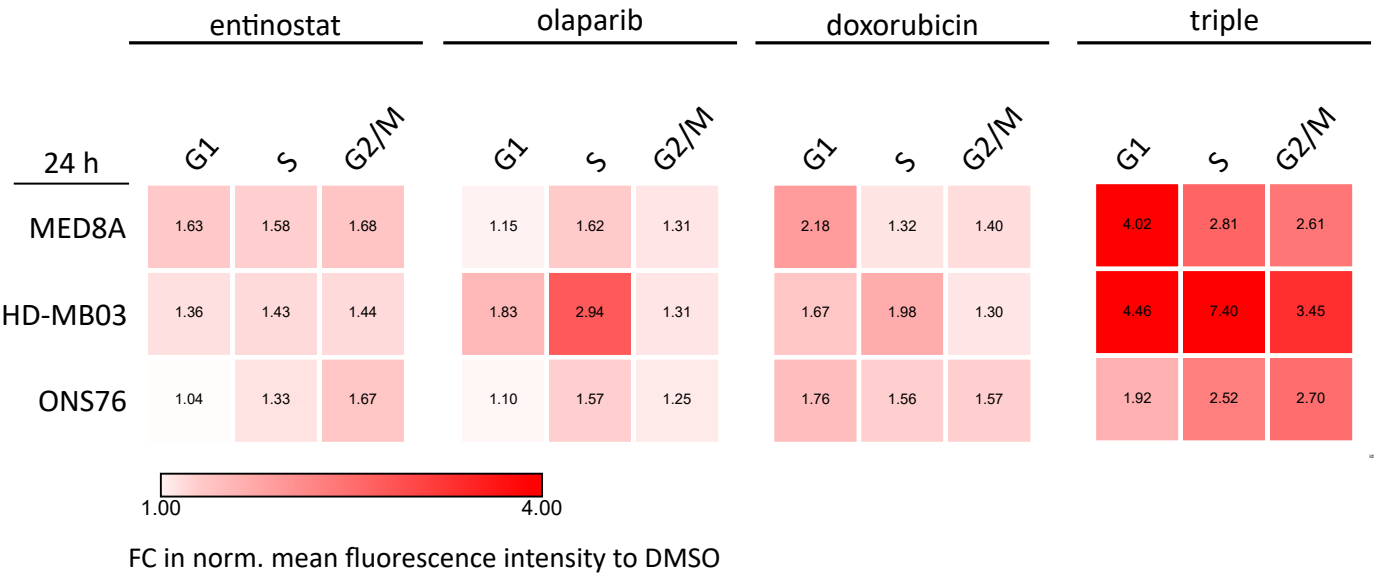

D

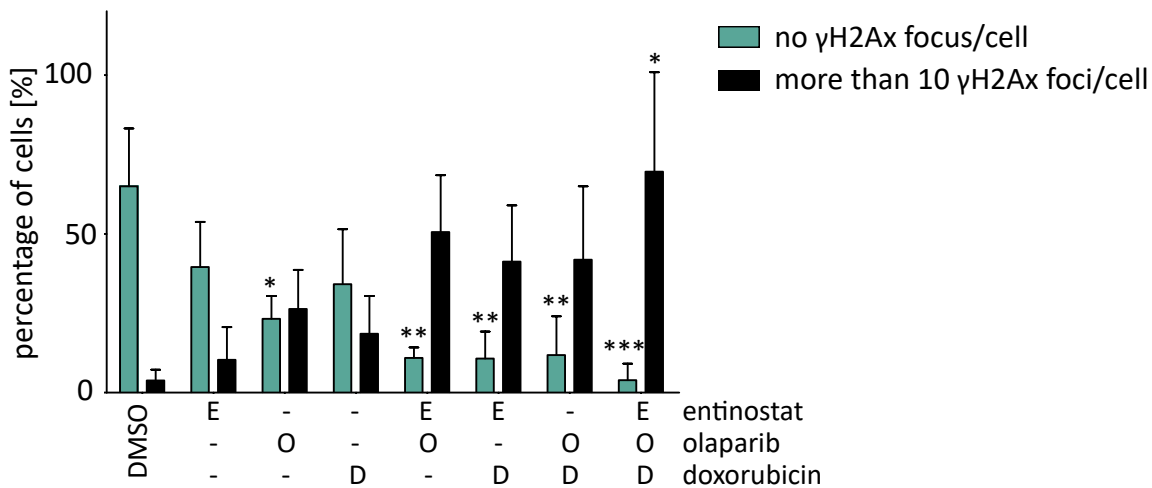

Figure S4

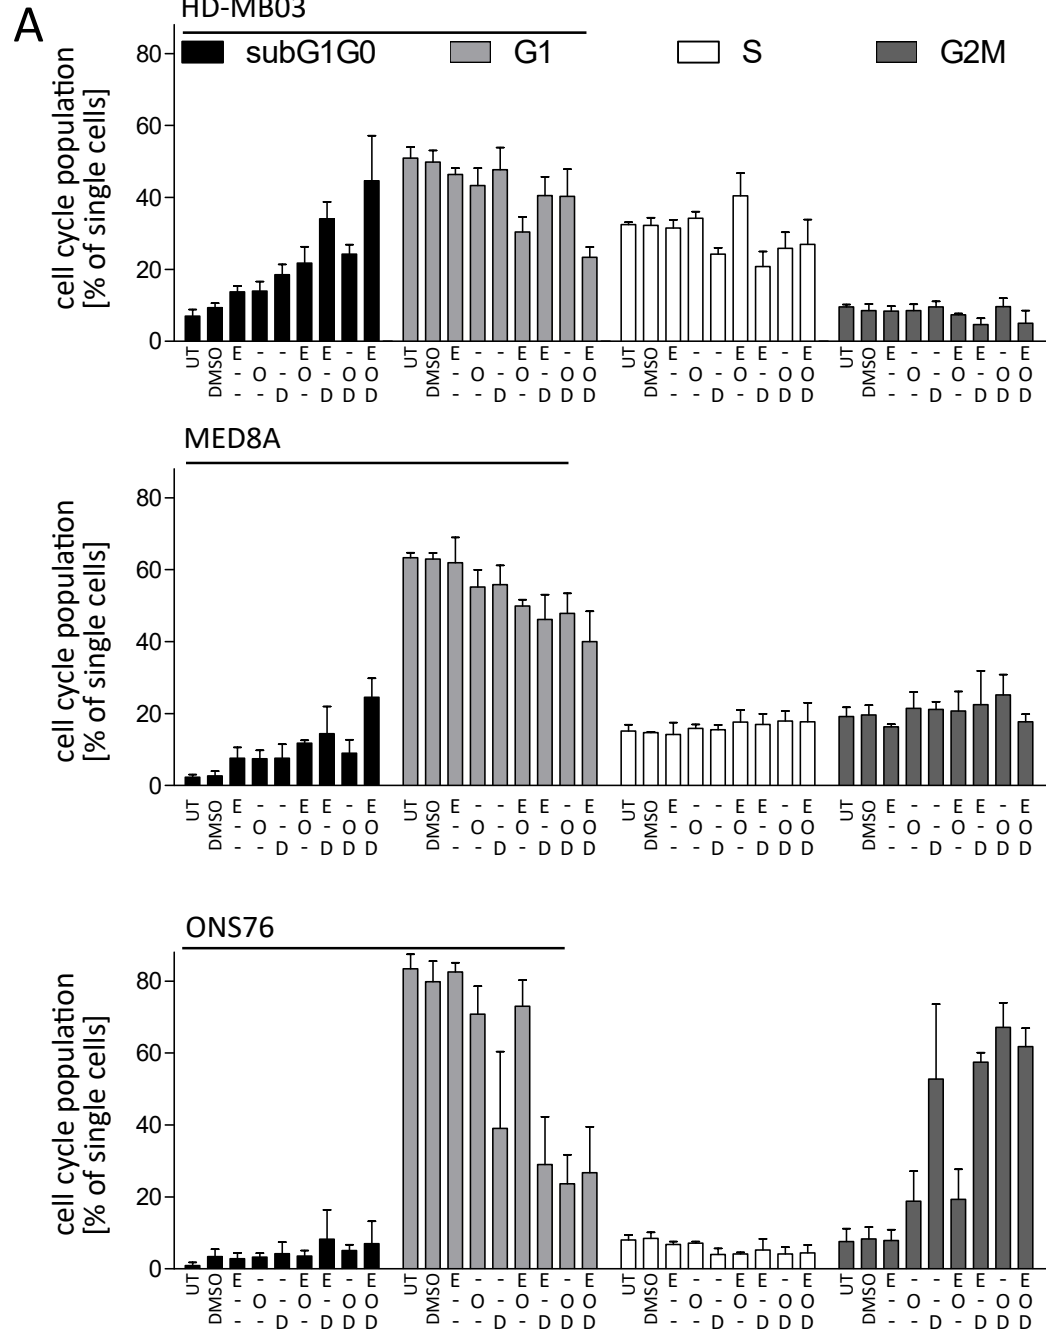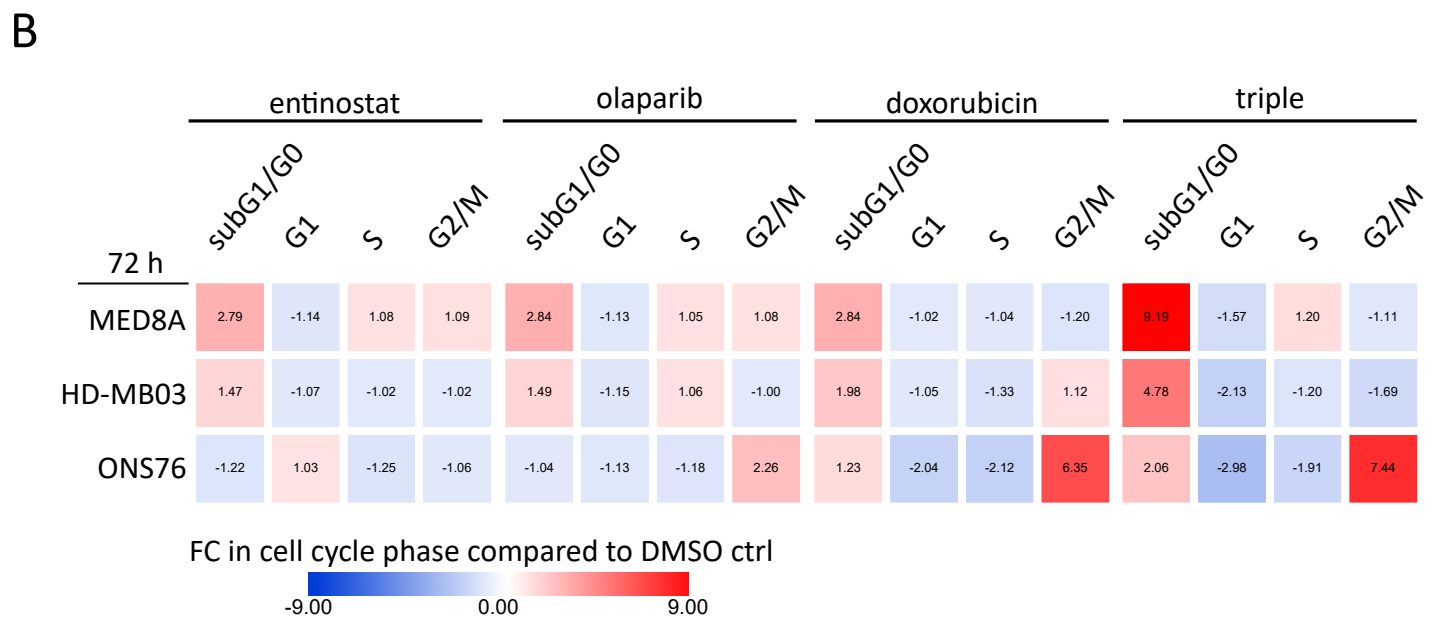

Supplement: MOESM1 [file 26120130]
