# Supplementary material for: Class I HDAC inhibition reduces DNA damage repair capacity of MYC-amplified medulloblastoma cells
Source: J Neurooncol. 2023 Oct 3;164(3):617–32. doi: 10.1007/s11060-023-04445-w (PMC10589189; doi:10.1007/s11060-023-04445-w)
Supplement: Supplementary file 3 — Supplementary file3 (XLSX 25 KB) [file 11060_2023_4445_MOESM3_ESM.xlsx]

## Sheet: Tabelle1
S2_GSEA_DEG_OA_FDRbelow0.25
KEGG						GO						Reactome
Gene Set	Size	Direction	p Value	FDR		Gene Set	Size	Direction	p Value	FDR		Gene Set	Size	Direction	p Value	FDR
Proteasome	42	Up	1.39474e-05	0.00456078		kinetochore	130	Down	5.93728e-07	0.00708852		mitotic prometaphase	189	Down	4.2917e-07	0.000736885
Fanconi anemia pathway	48	Down	6.20724e-05	0.00972607		chromosome, centromeric region	189	Down	3.00035e-06	0.0120305		activation of atr in response to replication stress	36	Down	8.89955e-07	0.000764027
HALLMARK_MYC_TARGETS_V2	56	Up	8.923e-05	0.00972607		condensed chromosome kinetochore	101	Down	3.45474e-06	0.0120305		homologous dna pairing and strand exchange	41	Down	1.87401e-06	0.00100179
Oxidative phosphorylation	120	Up	0.00144259	0.117932		condensed chromosome, centromeric region	114	Down	4.03066e-06	0.0120305		presynaptic phase of homologous dna pairing and strand exchange	38	Down	2.33381e-06	0.00100179
Glycosaminoglycan biosynthesis - chondroitin sulfate / dermatan sulfate	20	Down	0.00220192	0.134793		poly-pyrimidine tract binding	23	Up	9.99512e-06	0.0238664		resolution of sister chromatid cohesion	118	Down	5.88242e-06	0.00169377
Steroid biosynthesis	18	Down	0.0027838	0.134793		SMAD protein complex	8	Up	2.28949e-05	0.0455569		recruitment of numa to mitotic centrosomes	87	Down	5.91884e-06	0.00169377
Progesterone-mediated oocyte maturation	87	Down	0.00329304	0.134793		interstrand cross-link repair	46	Down	3.94344e-05	0.0672582		loss of nlp from mitotic centrosomes	68	Down	1.1408e-05	0.00244844
HALLMARK_MYC_TARGETS_V1	193	Up	0.00346222	0.134793		condensed chromosome	212	Down	5.40808e-05	0.0731219		loss of proteins required for interphase microtubule organization from the centrosome	68	Down	1.1408e-05	0.00244844
Mismatch repair	22	Down	0.00370989	0.134793		pericentriolar material	18	Down	5.65603e-05	0.0731219		recruitment of mitotic centrosome proteins and complexes	77	Down	1.94781e-05	0.00285674
Homologous recombination	41	Down	0.00556142	0.181858		protein transmembrane transporter activity	14	Up	6.12463e-05	0.0731219		centrosome maturation	77	Down	1.94781e-05	0.00285674
Folate biosynthesis	25	Down	0.00706229	0.192943		HALLMARK_MYC_TARGETS_V2	56	Up	8.923e-05	0.0806205		hdr through single strand annealing (ssa)	36	Down	1.95221e-05	0.00285674
Parkinson disease	126	Up	0.00708047	0.192943		mitochondrial translational elongation	85	Up	9.03236e-05	0.0806205		mitotic spindle checkpoint	107	Down	1.99656e-05	0.00285674
						sister chromatid cohesion	131	Down	9.39272e-05	0.0806205		aurka activation by tpx2	71	Down	2.16737e-05	0.0028626
						condensed nuclear chromosome	93	Down	0.000101283	0.0806205		amplification of signal from the kinetochores	92	Down	2.75503e-05	0.00315359
						ciliary basal body-plasma membrane docking	95	Down	0.00010129	0.0806205		amplification of signal from unattached kinetochores via a mad2 inhibitory signal	92	Down	2.75503e-05	0.00315359
						macromolecule transmembrane transporter activity	16	Up	0.000114096	0.0851373		regulation of plk1 activity at g2/m transition	86	Down	4.94064e-05	0.00530192
						microtubule organizing center part	162	Down	0.000134248	0.0942816		HALLMARK_MYC_TARGETS_V2	56	Up	8.923e-05	0.00901223
						condensed nuclear chromosome, centromeric region	21	Down	0.000149002	0.0945341		cross-presentation of soluble exogenous antigens (endosomes)	47	Up	0.000108324	0.009437
						preribosome	70	Up	0.000152998	0.0945341		mitochondrial translation elongation	85	Up	0.000109913	0.009437
						chromosomal region	329	Down	0.000158362	0.0945341		cholesterol biosynthesis	24	Down	0.000109924	0.009437
						snoRNA binding	28	Up	0.000174846	0.0959904		processing of dna double-strand break ends	83	Down	0.000121254	0.00991395
						regulation of non-motile cilium assembly	11	Down	0.000176882	0.0959904		negative regulation of notch4 signaling	52	Up	0.000144102	0.0112465
						DNA replication checkpoint	17	Down	0.000189717	0.0984796		anchoring of the basal body to the plasma membrane	96	Down	0.000152877	0.0114126
						single-stranded DNA exodeoxyribonuclease activity	6	Down	0.000211854	0.102511		mitochondrial translation	91	Up	0.000171661	0.0122809
						mitochondrial gene expression	152	Up	0.000214655	0.102511		fbxl7 down-regulates aurka during mitotic entry and in early mitosis	51	Up	0.000215822	0.0145872
						protein localization to chromosome, centromeric region	22	Down	0.000274596	0.126093		rho gtpases activate formins	131	Down	0.00022089	0.0145872
						translational termination	99	Up	0.000325428	0.143899		mitochondrial translation initiation	85	Up	0.000271977	0.0169076
						mitochondrial translation	127	Up	0.000366511	0.149034		nik-->noncanonical nf-kb signaling	56	Up	0.000275721	0.0169076
						meiotic cell cycle	233	Down	0.000371206	0.149034		auf1 (hnrnp d0) binds and destabilizes mrna	50	Up	0.000304144	0.0180074
						mitochondrial translational termination	87	Up	0.0003783	0.149034		vif-mediated degradation of apobec3g	51	Up	0.000327721	0.0187565
						positive regulation of non-motile cilium assembly	8	Down	0.000396247	0.149034		regulation of runx3 expression and activity	53	Up	0.000364362	0.0197199
						preribosome, large subunit precursor	22	Up	0.000430736	0.149034		mitochondrial translation termination	85	Up	0.000367524	0.0197199
						organellar ribosome	83	Up	0.00044509	0.149034		hdr through homologous recombination (hrr)	64	Down	0.000402226	0.0203804
						mitochondrial ribosome	83	Up	0.00044509	0.149034		regulation of ornithine decarboxylase (odc)	48	Up	0.000403572	0.0203804
						ribosomal large subunit biogenesis	64	Up	0.000449287	0.149034		cell cycle	598	Down	0.000442334	0.0213305
						mitochondrial protein complex	243	Up	0.00045609	0.149034		degradation of gli1 by the proteasome	57	Up	0.000452946	0.0213305
						ureteric bud elongation	8	Up	0.000461869	0.149034		dectin-1 mediated noncanonical nf-kb signaling	57	Up	0.000459656	0.0213305
						regulation of stem cell differentiation	121	Up	0.000502572	0.1579		regulation of pten stability and activity	66	Up	0.000478532	0.0216221
						spindle microtubule	56	Down	0.000559027	0.166283		degradation of gli2 by the proteasome	57	Up	0.000520076	0.0228967
						translational elongation	125	Up	0.000565008	0.166283		homology directed repair	121	Down	0.000550068	0.0236117
						protein localization to kinetochore	18	Down	0.000571035	0.166283		activation of the pre-replicative complex	33	Down	0.000584555	0.0239401
						regulation of hematopoietic progenitor cell differentiation	93	Up	0.000605366	0.172082		chromosome maintenance	89	Down	0.000585604	0.0239401
						low-density lipoprotein particle receptor catabolic process	13	Up	0.000660176	0.172356		vpu mediated degradation of cd4	49	Up	0.000726785	0.0290207
						sister chromatid segregation	233	Down	0.00067044	0.172356		regulation of runx2 expression and activity	70	Up	0.000771429	0.0298004
						tetrahydrobiopterin biosynthetic process	7	Down	0.000682105	0.172356		g2/m dna damage checkpoint	81	Down	0.000789768	0.0298004
						tetrahydrobiopterin metabolic process	7	Down	0.000682105	0.172356		hdr through homologous recombination (hrr) or single strand annealing (ssa)	115	Down	0.000801732	0.0298004
						regulation of cellular amino acid metabolic process	57	Up	0.000683858	0.172356		regulation of activated pak-2p34 by proteasome mediated degradation	47	Up	0.000815736	0.0298004
						microtubule nucleation	24	Down	0.000709165	0.172356		gli3 is processed to gli3r by the proteasome	57	Up	0.000861833	0.0308285
						Fanconi anaemia nuclear complex	13	Down	0.000709698	0.172356		regulation of apoptosis	50	Up	0.000910342	0.0318991
						N-terminal protein acetyltransferase complex	10	Up	0.000721821	0.172356		rrna modification in the nucleus and cytosol	57	Up	0.000935678	0.0321312
						condensed nuclear chromosome kinetochore	12	Down	0.000760721	0.175006		transcriptional regulation by runx2	115	Up	0.000966636	0.0325434
						centriole	121	Down	0.000774882	0.175006		e2f mediated regulation of dna replication	21	Down	0.00098956	0.0326745
						regulation of gene expression by genetic imprinting	16	Down	0.000801914	0.175006		e2f-enabled inhibition of pre-replication complex formation	9	Down	0.00112521	0.0364526
						nuclear chromosome segregation	298	Down	0.000806022	0.175006		scf-beta-trcp mediated degradation of emi1	52	Up	0.00117918	0.0374934
						replication fork	67	Down	0.000806211	0.175006		hh mutants that don't undergo autocatalytic processing are degraded by erad	52	Up	0.00126226	0.0394055
						poly(U) RNA binding	19	Up	0.000972758	0.207389		fanconi anemia pathway	35	Down	0.00131753	0.0403964
						protein localization to microtubule organizing center	28	Down	0.000994047	0.207679		ubiquitin-dependent degradation of cyclin d1	49	Up	0.00137069	0.0405772
						chromatin remodeling at centromere	35	Down	0.00100891	0.207679		ubiquitin-dependent degradation of cyclin d	49	Up	0.00137069	0.0405772
						positive regulation of stem cell differentiation	17	Up	0.00105711	0.213913		oxygen-dependent proline hydroxylation of hypoxia-inducible factor alpha	63	Up	0.00141637	0.0412188
						exodeoxyribonuclease activity	16	Down	0.00110435	0.216145		cell cycle checkpoints	271	Down	0.00146265	0.0418561
						exodeoxyribonuclease activity, producing 5'-phosphomonoesters	16	Down	0.00110435	0.216145		cell cycle, mitotic	496	Down	0.00163887	0.0461302
						spindle	318	Down	0.00117251	0.225783		autodegradation of the e3 ubiquitin ligase cop1	49	Up	0.00180476	0.0499803
						proteasome core complex	20	Up	0.00125052	0.236983		synthesis of diphthamide-eef2	7	Up	0.00188818	0.0504433
						regulation of hematopoietic stem cell differentiation	84	Up	0.00127202	0.237292		dna double-strand break repair	148	Down	0.0019071	0.0504433
						negative regulation of histone methylation	17	Down	0.00132011	0.242475		activation of e2f1 target genes at g1/s	28	Down	0.001939	0.0504433
						chromosome organization involved in meiotic cell cycle	64	Down	0.00136809	0.24293		g1/s-specific transcription	28	Down	0.001939	0.0504433
						microtubule polymerization	69	Down	0.0013771	0.24293		regulation of tp53 activity through phosphorylation	90	Down	0.00219922	0.0559192
						regulation of RNA stability	156	Up	0.00138363	0.24293		regulation of mrna stability by proteins that bind au-rich elements	82	Up	0.00221462	0.0559192
												resolution of d-loop structures through holliday junction intermediates	31	Down	0.00226057	0.0562522
												activation of nf-kappab in b cells	64	Up	0.00238185	0.0584233
												mitochondrial protein import	62	Up	0.00251119	0.0607285
												plasma lipoprotein clearance	32	Up	0.00258078	0.0609286
												dna strand elongation	32	Down	0.00260622	0.0609286
												lagging strand synthesis	20	Down	0.00262593	0.0609286
												degradation of dvl	54	Up	0.00267282	0.0611898
												resolution of d-loop structures through synthesis-dependent strand annealing (sdsa)	26	Down	0.00302729	0.0670568
												er-phagosome pathway	80	Up	0.00303942	0.0670568
												rna polymerase iii transcription termination	23	Up	0.00306199	0.0670568
												downstream signaling events of b cell receptor (bcr)	79	Up	0.00308532	0.0670568
												hh mutants abrogate ligand secretion	55	Up	0.00318195	0.0677082
												respiratory electron transport, atp synthesis by chemiosmotic coupling, and heat production by uncoupling proteins.	113	Up	0.00319415	0.0677082
												HALLMARK_MYC_TARGETS_V1	193	Up	0.00346222	0.0724954
												egfr transactivation by gastrin	9	Up	0.00367966	0.0749615
												rna polymerase iii transcription	41	Up	0.00371096	0.0749615
												rna polymerase iii abortive and retractive initiation	41	Up	0.00371096	0.0749615
												uch proteinases	90	Up	0.003837	0.0764244
												defective cftr causes cystic fibrosis	58	Up	0.00391465	0.0764244
												synthesis of pyrophosphates in the cytosol	10	Up	0.00391692	0.0764244
												assembly of the orc complex at the origin of replication	6	Down	0.00401756	0.0775073
												stabilization of p53	54	Up	0.00432382	0.0816485
												atf6 (atf6-alpha) activates chaperone genes	10	Down	0.00432732	0.0816485
												cilium assembly	191	Down	0.00444405	0.0829394
												activation of gene expression by srebf (srebp)	40	Down	0.00476639	0.0879988
												trna modification in the nucleus and cytosol	41	Up	0.0048408	0.0884218
												activation of ppargc1a (pgc-1alpha) by phosphorylation	10	Down	0.00572807	0.102228
												tp53 regulates transcription of caspase activators and caspases	12	Down	0.00576724	0.102228
												serotonin and melatonin biosynthesis	5	Down	0.00577524	0.102228
												telomere c-strand (lagging strand) synthesis	24	Down	0.00587861	0.102996
												respiratory electron transport	91	Up	0.00613631	0.105534
												resolution of d-loop structures	32	Down	0.00621075	0.105534
												regulation of hypoxia-inducible factor (hif) by oxygen	72	Up	0.00626932	0.105534
												cellular response to hypoxia	72	Up	0.00626932	0.105534
												m phase	356	Down	0.00635714	0.105973
												antigen processing-cross presentation	95	Up	0.00643365	0.106217
												chondroitin sulfate/dermatan sulfate metabolism	50	Down	0.00652902	0.106765
												deposition of new cenpa-containing nucleosomes at the centromere	54	Down	0.00674275	0.108066
												nucleosome assembly	54	Down	0.00674275	0.108066
												phosphate bond hydrolysis by ntpdase proteins	7	Down	0.00685075	0.108066
												ubiquitin mediated degradation of phosphorylated cdc25a	50	Up	0.00701101	0.108066
												p53-independent dna damage response	50	Up	0.00701101	0.108066
												p53-independent g1/s dna damage checkpoint	50	Up	0.00701101	0.108066
												vldlr internalisation and degradation	12	Up	0.00708435	0.108066
												activated ntrk2 signals through frs2 and frs3	10	Up	0.00711209	0.108066
												mismatch repair	14	Down	0.00724379	0.108301
												crmps in sema3a signaling	16	Down	0.00725372	0.108301
												vldl clearance	5	Up	0.00740104	0.109013
												tetrahydrobiopterin (bh4) synthesis, recycling, salvage and regulation	11	Down	0.00742835	0.109013
												translation	265	Up	0.0076986	0.11173
												cristae formation	30	Up	0.00774369	0.11173
												ldl clearance	19	Up	0.00786168	0.112488
												signaling by notch4	80	Up	0.00810437	0.115002
												degradation of beta-catenin by the destruction complex	79	Up	0.00861603	0.12126
												degradation of axin	52	Up	0.00883073	0.12248
												regulation of ras by gaps	64	Up	0.00896796	0.12248
												signaling by notch1 hd domain mutants in cancer	15	Down	0.00898801	0.12248
												constitutive signaling by notch1 hd domain mutants	15	Down	0.00898801	0.12248
												signaling by notch1 t(7;9)(notch1:m1580_k2555) translocation mutant	7	Down	0.00923449	0.123872
												constitutive signaling by notch1 t(7;9)(notch1:m1580_k2555) translocation mutant	7	Down	0.00923449	0.123872
												hedgehog 'on' state	82	Up	0.00964265	0.127671
												cdc6 association with the orc:origin complex	11	Down	0.0096664	0.127671
												scf(skp2)-mediated degradation of p27/p21	58	Up	0.0104932	0.137533
												post-chaperonin tubulin folding pathway	19	Down	0.0109555	0.142505
												nod1/2 signaling pathway	33	Down	0.0113582	0.145181
												rrna processing	178	Up	0.0113877	0.145181
												resolution of ap sites via the multiple-nucleotide patch replacement pathway	26	Down	0.011415	0.145181
												ptk6 expression	5	Up	0.0115968	0.146284
												ptk6 promotes hif1a stabilization	6	Up	0.0116721	0.146284
												transcriptional regulation by runx3	93	Up	0.012113	0.15071
												vitamins	5	Down	0.0122731	0.15096
												tp53 regulates transcription of genes involved in g1 cell cycle arrest	14	Down	0.0123089	0.15096
												rrna processing in the nucleus and cytosol	168	Up	0.0127169	0.154857
												mismatch repair (mmr) directed by msh2:msh3 (mutsbeta)	13	Down	0.0129968	0.157151
												mrna splicing - major pathway	172	Up	0.0130926	0.157203
												protein localization	122	Up	0.0138904	0.165444
												fgfr2 alternative splicing	25	Up	0.0139717	0.165444
												processive synthesis on the lagging strand	15	Down	0.0140944	0.165754
												type i hemidesmosome assembly	11	Up	0.0144831	0.167092
												mismatch repair (mmr) directed by msh2:msh6 (mutsalpha)	13	Down	0.0144933	0.167092
												erk/mapk targets	22	Down	0.0145002	0.167092
												grb2 events in egfr signaling	7	Up	0.0148076	0.169498
												metabolism of rna	616	Up	0.0149815	0.170352
												cyclin a/b1/b2 associated events during g2/m transition	24	Down	0.0153581	0.173159
												cytosolic sulfonation of small molecules	20	Up	0.01543	0.173159
												cyclin e associated events during g1/s transition	81	Up	0.0157006	0.173408
												base excision repair	38	Down	0.0157552	0.173408
												resolution of abasic sites (ap sites)	38	Down	0.0157552	0.173408
												gaba a receptor activation	13	Down	0.0165212	0.180681
												epha-mediated growth cone collapse	30	Down	0.0174121	0.189219
												signaling by the b cell receptor (bcr)	108	Up	0.0177536	0.191717
												signaling by rho gtpases	404	Down	0.0184611	0.195349
												processing and activation of sumo	9	Down	0.0185904	0.195349
												polymerase switching on the c-strand of the telomere	14	Down	0.0186777	0.195349
												polymerase switching	14	Down	0.0186777	0.195349
												leading strand synthesis	14	Down	0.0186777	0.195349
												hedgehog ligand biogenesis	61	Up	0.018822	0.195349
												hs-gag degradation	21	Down	0.0188963	0.195349
												metal ion slc transporters	26	Down	0.0190001	0.195349
												gaba receptor activation	54	Down	0.0191405	0.195621
												formation of atp by chemiosmotic coupling	17	Up	0.0197927	0.200929
												atf6 (atf6-alpha) activates chaperones	12	Down	0.0199984	0.200929
												telomere maintenance	64	Down	0.0202055	0.200929
												defective ext2 causes exostoses 2	14	Down	0.020245	0.200929
												defective ext1 causes exostoses 1, trps2 and chds	14	Down	0.020245	0.200929
												major pathway of rrna processing in the nucleolus and cytosol	159	Up	0.0204902	0.201495
												rna polymerase iii transcription initiation from type 3 promoter	28	Up	0.0205368	0.201495
												shc-related events triggered by igf1r	8	Up	0.0224409	0.217864
												fceri mediated nf-kb activation	77	Up	0.0224589	0.217864
												gluconeogenesis	34	Down	0.0226664	0.218641
												apc-cdc20 mediated degradation of nek2a	24	Down	0.0230916	0.219904
												meiosis	93	Down	0.0231263	0.219904
												rna polymerase iii transcription initiation	36	Up	0.0231815	0.219904
												extension of telomeres	29	Down	0.0250108	0.234974
												activation of nima kinases nek9, nek6, nek7	7	Down	0.0250438	0.234974
												pten regulation	135	Up	0.0257357	0.240153
												mastl facilitates mitotic progression	10	Down	0.0259543	0.240884
												pcp/ce pathway	88	Up	0.0261809	0.241681
												striated muscle contraction	35	Down	0.0264357	0.242727
												pcna-dependent long patch base excision repair	21	Down	0.0266847	0.243711
												rho gtpase effectors	281	Down	0.0270409	0.245658
												oas antiviral response	8	Up	0.0272097	0.24589
												runx2 regulates genes involved in cell migration	8	Up	0.0277113	0.247967
												glycosaminoglycan metabolism	122	Down	0.0277284	0.247967
												plasma lipoprotein assembly, remodeling, and clearance	68	Up	0.0279486	0.248641
