# Supplementary material for: Class I HDAC inhibition reduces DNA damage repair capacity of MYC-amplified medulloblastoma cells
Source: J Neurooncol. 2023 Oct 3;164(3):617–32. doi: 10.1007/s11060-023-04445-w (PMC10589189; doi:10.1007/s11060-023-04445-w)
Supplement: Supplementary file 4 — Supplementary file4 (XLSX 12 KB) [file 11060_2023_4445_MOESM4_ESM.xlsx]

## Sheet: Tabelle1
S3_Ingenuity_Pathway_Analysis_DEG24h48h_DEG_OA
DEG 24/48		DEG OA
Ingenuity Canonical Pathways	z-score	Ingenuity Canonical Pathways	z-score
Synaptogenesis Signaling Pathway	4.2	Ovarian Cancer Signaling	1.3
CXCR4 Signaling	3.6	ATM Signaling	-0.4
CNTF Signaling	3.4	Cell Cycle: G2/M DNA Damage Checkpoint Regulation	-0.5
VEGF Family Ligand-Receptor Interactions	3.4	Role of CHK Proteins in Cell Cycle Checkpoint Control	-1.3
Glioblastoma Multiforme Signaling	3.4	Wnt/β-catenin Signaling	-1.4
PDGF Signaling	3.3
Rac Signaling	3.3
ERK/MAPK Signaling	3.1
14-3-3-mediated Signaling	3.1
Thrombopoietin Signaling	3.1
Glioma Invasiveness Signaling	3.1
Cholecystokinin/Gastrin-mediated Signaling	3.1
PI3K Signaling in B Lymphocytes	3.1
Melanocyte Development and Pigmentation Signaling	3
IL-3 Signaling	3
Renin-Angiotensin Signaling	3
IGF-1 Signaling	2.9
Colorectal Cancer Metastasis Signaling	2.9
GDNF Family Ligand-Receptor Interactions	2.8
FLT3 Signaling in Hematopoietic Progenitor Cells	2.8
Renal Cell Carcinoma Signaling	2.8
Ovarian Cancer Signaling	2.7
Glioma Signaling	2.7
Prolactin Signaling	2.7
NGF Signaling	2.6
Neurotrophin/TRK Signaling	2.5
IL-2 Signaling	2.5
p70S6K Signaling	2.4
GM-CSF Signaling	2.4
VEGF Signaling	2.3
Systemic Lupus Erythematosus In T Cell Signaling Pathway	2.3
NRF2-mediated Oxidative Stress Response	2.3
Pancreatic Adenocarcinoma Signaling	2.2
Paxillin Signaling	2.2
HGF Signaling	2.1
ErbB4 Signaling	2.1
ERK5 Signaling	2.1
mTOR Signaling	2.1
Integrin Signaling	2
Cell Cycle: G2/M DNA Damage Checkpoint Regulation	2
Actin Nucleation by ARP-WASP Complex	1.9
B Cell Receptor Signaling	1.9
ErbB Signaling	1.8
CDK5 Signaling	1.7
Telomerase Signaling	1.7
Endocannabinoid Developing Neuron Pathway	1.7
AMPK Signaling	1.7
Mouse Embryonic Stem Cell Pluripotency	1.6
EGF Signaling	1.6
Melanoma Signaling	1.6
Superpathway of Inositol Phosphate Compounds	1.5
3-phosphoinositide Biosynthesis	1.5
Non-Small Cell Lung Cancer Signaling	1.4
SAPK/JNK Signaling	1.4
Ceramide Signaling	1.4
Ephrin Receptor Signaling	1.4
Acute Myeloid Leukemia Signaling	1.3
Apelin Pancreas Signaling Pathway	1.2
SPINK1 General Cancer Pathway	1.1
ILK Signaling	1.1
D-myo-inositol-5-phosphate Metabolism	1.1
T Cell Exhaustion Signaling Pathway	0.8
Inhibition of Angiogenesis by TSP1	0.8
Wnt/Ca+ pathway	0.7
TGF-β Signaling	0.6
Pyridoxal 5'-phosphate Salvage Pathway	0.5
p53 Signaling	0.5
Insulin Receptor Signaling	0.5
3-phosphoinositide Degradation	0.5
PPARα/RXRα Activation	0.2
PI3K/AKT Signaling	0.1
Role of BRCA1 in DNA Damage Response	0
Salvage Pathways of Pyrimidine Ribonucleotides	-0.3
Agrin Interactions at Neuromuscular Junction	-0.4
HIPPO signaling	-0.6
Leucine Degradation I	-1.4
ATM Signaling	-1.5
Aryl Hydrocarbon Receptor Signaling	-1.5
OX40 Signaling Pathway	-1.5
PTEN Signaling	-1.9
Mitotic Roles of Polo-Like Kinase	-2.1
Cyclins and Cell Cycle Regulation	-2.3
