# Supplementary material for: Class I HDAC inhibition reduces DNA damage repair capacity of MYC-amplified medulloblastoma cells
Source: J Neurooncol. 2023 Oct 3;164(3):617–32. doi: 10.1007/s11060-023-04445-w (PMC10589189; doi:10.1007/s11060-023-04445-w)
Supplement: Supplementary file 5 — Supplementary file5 (XLSX 13 KB) [file 11060_2023_4445_MOESM5_ESM.xlsx]

## Sheet: Tabelle1
S4_definition_altered_pathways
GSEA DEG24h48h	GSEA DEG OA	IPA DEG24h48h	IPA DEG OA	Summary
cytoscape enrichment map	cytoscape enrichment map	canonical pathways	canonical pathways
endo-lysosomal system	cytokinesis	Actin Nucleation by ARP-WASP Complex		endosomal-lysosomal vesicle system and microtubuli-associated transport
cytoskeleton		Inhibition of Angiogenesis by TSP1		cytoskeleton
				cell-cell and cell-matrix interactions
neurogenesis		Mouse Embryonic Stem Cell Pluripotency		neuronal differentiation
heart development				differentiation
	proteasomal regulations			proteasome
ion metabolism		3-phosphoinositide Biosynthesis		metabolism
nucleotide metabolism		D-myo-inositol-5-phosphate Metabolism
		Leucine Degradation I
		3-phosphoinositide Degradation
		PPARα/RXRα Activation
protone transport				mRNA export and transport
nuclear export				mRNA splicing
RNA export				mRNA processing
RNA splicing
RNA processing
DNA repair	interstrand crossling repair	Role of BRCA1 in DNA Damage Response	ATM Signaling	DNA repair, homologous recombiation repair
	repair of DSBs/HR repair	ATM Signaling		DNA damage signaling, ATM
immune system	antigen-presentation			MHC-antigen processing and presentation
MHC processing				immune response
histone acetylation				chromatin remodelling
histone methylation
chromosomal segregation	condensed chromosome			DNA replication
helicase DNA remodeling	mitochondrial translation
cell cycle	cell cycle	Mitotic Roles of Polo-Like Kinase	Role of CHK Proteins in Cell Cycle Checkpoint Control	cell cycle control
	mitotic spindle checkpoint	Cyclins and Cell Cycle Regulation	Cell Cycle: G2/M DNA Damage Checkpoint Regulation	cell cycle checkpoints
	E2F transcription control	Cell Cycle: G2/M DNA Damage Checkpoint Regulation
	transcription
	p53 regulation	NRF2-mediated Oxidative Stress Response		apoptosis
		p53 Signaling
synaptic vesicle system		GDNF Family Ligand-Receptor Interactions		synaptic vesicles and plasticity
		Agrin Interactions at Neuromuscular Junction		nervous system signalin
		Endocannabinoid Developing Neuron Pathway
		Synaptogenesis Signaling Pathway
signaling pathways		Aryl Hydrocarbon Receptor Signaling	Ovarian Cancer Signaling	signaling pathways
PI3 signaling		OX40 Signaling Pathway	Wnt/β-catenin Signaling
		PI3K Signaling in B Lymphocytes
		IL-2 Signaling
		ERK/MAPK Signaling
		PDGF Signaling
		Pancreatic Adenocarcinoma Signaling
		CXCR4 Signaling
		Ephrin Receptor Signaling
		Apelin Pancreas Signaling Pathway
		mTOR Signaling
		Glioblastoma Multiforme Signaling
		Cholecystokinin/Gastrin-mediated Signaling
		Rac Signaling
		Melanoma Signaling
		Semaphorin Signaling in Neurons
		Wnt/Ca+ pathway
		Renin-Angiotensin Signaling
		B Cell Receptor Signaling
		ILK Signaling
		AMPK Signaling
		Systemic Lupus Erythematosus In T Cell Signaling Pathway
		VEGF Family Ligand-Receptor Interactions
		ERK5 Signaling
		GM-CSF Signaling
		IL-3 Signaling
		Glioma Invasiveness Signaling
		Paxillin Signaling
		CNTF Signaling
		ErbB Signaling
		Thrombopoietin Signaling
		SPINK1 General Cancer Pathway
		ErbB4 Signaling
		IGF-1 Signaling
		Pyridoxal 5'-phosphate Salvage Pathway
		Glioma Signaling
		Prolactin Signaling
		FLT3 Signaling in Hematopoietic Progenitor Cells
		PTEN Signaling
		Insulin Receptor Signaling
		EGF Signaling
		NGF Signaling
		Renal Cell Carcinoma Signaling
		Colorectal Cancer Metastasis Signaling
		p70S6K Signaling
		Ceramide Signaling
		Telomerase Signaling
		14-3-3-mediated Signaling
		Integrin Signaling
		Superpathway of Inositol Phosphate Compounds
		SAPK/JNK Signaling
		VEGF Signaling
		HIPPO signaling
		Melanocyte Development and Pigmentation Signaling
		T Cell Exhaustion Signaling Pathway
		Non-Small Cell Lung Cancer Signaling
		HGF Signaling
		PI3K/AKT Signaling
		Neurotrophin/TRK Signaling
		CDK5 Signaling
		Ovarian Cancer Signaling
		TGF-β Signaling
		Salvage Pathways of Pyrimidine Ribonucleotides
		Acute Myeloid Leukemia Signaling
