# Supplementary material for: Class I HDAC inhibition reduces DNA damage repair capacity of MYC-amplified medulloblastoma cells
Source: J Neurooncol. 2023 Oct 3;164(3):617–32. doi: 10.1007/s11060-023-04445-w (PMC10589189; doi:10.1007/s11060-023-04445-w)
Supplement: Supplementary file 6 — Supplementary file6 (XLSX 9 KB) [file 11060_2023_4445_MOESM6_ESM.xlsx]

## Sheet: Tabelle1
S5_translational_drug_library
compound
Trametinib
Crizotinib
Decitabine
Nilotinib
Olaparib
Vismodegib
Vorinostat
Entinostat
Pazopanib
APR-246
Imatinib
I-BET151
Everolimus
Afatinib
Rapamycin (Sirolimus)
Thiotepa
Ponatinib
Foretinib
Dasatinib
Sorafenib
Volasertib
Cabozantinib
Doxorubicin
Chloroquine
Melphalan
Axitinib
Methotrexate
Bortezomib
Sunitinib
Vandetanib
Ceritinib
Selinexor
Idasanutlin
Tazemetostat
Dabrafenib
Talazoparib
Cobimetinib
Ribociclib
Panobinostat
Alectinib
Vinorelbine
Vincristine
Temsirolimus
Temozolomide
Merestinib
A-1331852
Entrectinib
Venetoclax
Palbociclib
Valproic acid
Vinblastine
Dactinomycin
Daunorubicin
Topotecan
A-1155463
Mercaptopurine
Cytarabine
Mitoxantrone
Gemcitabine
Paclitaxel
Etoposide
Thioguanine
Navitoclax
Larotrectinib
Vemurafenib
Erlotinib
Lapatinib
Ruxolitinib
Selumetinib
A-1210477
Busulfan
Irinotecan
Lorlatinib
Cisplatin
