# Supplementary material for: Class I HDAC inhibition reduces DNA damage repair capacity of MYC-amplified medulloblastoma cells
Source: J Neurooncol. 2023 Oct 3;164(3):617–32. doi: 10.1007/s11060-023-04445-w (PMC10589189; doi:10.1007/s11060-023-04445-w)
Supplement: Supplementary file 8 — Supplementary file8 (XLSX 10 KB) [file 11060_2023_4445_MOESM8_ESM.xlsx]

## Sheet: Tabelle1
S7_drugs_cmax_and_clinical_trial
compound	cmax	trial identifier	paediatric (trial) status [entity]
vinblastine	10 nM	NCT00213278p	monotherapy in pLGG
selinexor	2.2 µM	NCT02212561p	phase I/II [refractory/relapsed leukaemia, MDS]
olaparib	19.1 µM	NCT02430311a	phase II paediatric match screening trial
			phase I/II ESMART
idasanutlin	6.4 µM	NCT01901172a	phase I/II [refractory/relapsed acute leukaemia/solid tumours]
ribociclib	5.9 µM	NCT01747876p	phase I/II [HGG; DIPG]
			phase II [teratoma]
			phase I/II ESMART
pamiparib	14.9µM	NCT02361723
