# Supplementary material for: Class I HDAC inhibition reduces DNA damage repair capacity of MYC-amplified medulloblastoma cells
Source: J Neurooncol. 2023 Oct 3;164(3):617–32. doi: 10.1007/s11060-023-04445-w (PMC10589189; doi:10.1007/s11060-023-04445-w)
Supplement: Supplementary file 9 — Supplementary file9 (XLSX 560 KB) [file 11060_2023_4445_MOESM9_ESM.xlsx]

## Sheet: Tabelle1
S8_DEG_listed
row.names	name	logFC	adj. P-value
205827_at	CCK	6.59732	1.82796e-10
221760_at	MAN1A1	6.51354	4.51898e-12
214023_x_at	TUBB2B	6.50354	7.66547e-11
1556499_s_at	COL1A1	6.44591	6.78217e-12
206310_at	SPINK2	6.27636	1.70568e-11
242348_at	FAM19A4	6.26656	4.51898e-12
230303_at	SYNPR	6.18916	2.42808e-07
214079_at	DHRS2	5.86736	1.45556e-06
223423_at	GPR160	5.79325	4.51898e-12
224641_at	FYTTD1	5.74839	7.73071e-11
206857_s_at	FKBP1B	5.65277	6.06937e-10
223821_s_at	SUSD4	5.54882	2.65872e-11
202201_at	BLVRB	5.51718	1.07982e-10
208789_at	CAVIN1	5.49884	7.50363e-12
213506_at	F2RL1	5.41255	1.09514e-11
33767_at	NEFH	5.34603	3.53793e-07
206765_at	KCNJ2	5.2918	7.66547e-11
230195_at	LINC01405	5.19929	9.16503e-10
223484_at	C15orf48	5.15191	3.56786e-11
205505_at	GCNT1	5.12862	2.57709e-11
201105_at	LGALS1	5.08069	1.15345e-10
231120_x_at	PKIB	5.06817	4.51898e-12
200916_at	TAGLN2	5.01142	5.34785e-10
202575_at	CRABP2	4.95767	1.6459e-09
213479_at	NPTX2	4.95688	2.14272e-06
228956_at	UGT8	4.9395	5.56741e-10
206247_at	MICB	4.90698	2.57709e-11
214636_at	CALCB	4.90509	1.05259e-09
1554485_s_at	TMEM37	4.89035	8.29797e-12
201631_s_at	IER3	4.88516	2.71328e-09
214774_x_at	TOX3	4.8799	1.15345e-10
242517_at	KISS1R	4.87985	2.06139e-09
44783_s_at	HEY1	4.86686	5.15609e-12
224802_at	NDFIP2	4.85343	7.66547e-11
219410_at	TMEM45A	4.83657	1.37849e-09
207725_at	POU4F2	4.81415	1.39685e-08
238066_at	RBP7	4.81387	1.40628e-08
47560_at	ADGRL1	4.80706	2.0497e-10
226051_at	SELENOM	4.80393	3.91489e-11
217995_at	SQOR	4.79642	4.51898e-12
201110_s_at	THBS1	4.77467	9.97706e-09
202016_at	MEST	4.7413	4.51898e-12
209291_at	ID4	4.73299	1.14263e-10
225540_at	MAP2	4.70243	5.47135e-08
223557_s_at	TMEFF2	4.6992	1.55902e-09
234994_at	TMEM200A	4.69006	1.24406e-10
220014_at	PRR16	4.68074	7.61637e-11
227862_at	TRNP1	4.67973	1.07982e-10
203505_at	ABCA1	4.67809	2.70467e-11
221916_at	NEFL	4.67574	5.94993e-09
204415_at	IFI6	4.66967	2.0497e-10
205051_s_at	KIT	4.65394	2.25069e-11
219895_at	TMEM255A	4.60462	4.8041e-11
201649_at	UBE2L6	4.56565	1.92014e-10
203130_s_at	KIF5C	4.56112	9.97692e-09
200878_at	EPAS1	4.55696	1.52181e-09
230645_at	FRMD3	4.51399	7.24579e-09
225809_at	PARM1	4.49848	1.11507e-09
221841_s_at	KLF4	4.44972	1.37849e-09
1562921_at	EP300-AS1	4.43158	2.46784e-11
202936_s_at	SOX9	4.34993	2.398e-09
204730_at	RIMS3	4.34794	2.8778e-10
239533_at	GPR155	4.30411	1.96893e-10
228863_at	PCDH17	4.30215	8.29347e-09
206552_s_at	TAC1	4.28534	2.0121e-09
226272_at	RCAN3	4.27923	2.39744e-10
202499_s_at	SLC2A3	4.26484	3.58732e-11
229860_x_at	C4orf48	4.2456	1.55696e-10
241382_at	PCP4L1	4.24313	1.00677e-07
229254_at	MFSD4A	4.20362	9.39004e-10
203485_at	RTN1	4.13682	1.78506e-06
207056_s_at	SLC4A8	4.13556	1.09514e-11
209392_at	ENPP2	4.10537	1.36847e-06
205751_at	SH3GL2	4.09239	4.54232e-09
203217_s_at	ST3GAL5	4.07155	6.50893e-12
205364_at	ACOX2	4.06301	3.48215e-10
212256_at	GALNT10	4.05304	2.46784e-11
208792_s_at	CLU	4.03973	2.54335e-09
219313_at	GRAMD1C	4.03819	1.62152e-10
232010_at	FSTL5	4.03596	3.18462e-09
203789_s_at	SEMA3C	4.02514	4.52783e-06
209083_at	CORO1A	4.0077	1.3574e-09
205549_at	PCP4	3.99686	3.51282e-11
234980_at	TMEM56	3.99674	2.0497e-10
205489_at	CRYM	3.99661	4.7039e-07
201163_s_at	IGFBP7	3.98928	1.9904e-09
213421_x_at	PRSS3	3.97498	2.9601e-10
230917_at	PLCG2	3.97354	6.91466e-09
231018_at	PALM3	3.95792	1.39033e-09
219181_at	LIPG	3.94487	1.09764e-08
214434_at	HSPA12A	3.93387	3.331e-09
221019_s_at	COLEC12	3.89963	3.0625e-09
204160_s_at	ENPP4	3.89501	4.24923e-11
203665_at	HMOX1	3.88924	4.81662e-10
1552368_at	CTCFL	3.88703	3.39169e-10
206414_s_at	ASAP2	3.88683	7.43977e-10
218330_s_at	NAV2	3.88175	2.74232e-10
205103_at	C1orf61	3.87126	1.29635e-09
219736_at	TRIM36	3.86418	4.29113e-08
201939_at	PLK2	3.84463	2.26421e-09
218717_s_at	P3H2	3.83326	3.29131e-09
219463_at	LAMP5	3.81526	1.60135e-07
205637_s_at	SH3GL3	3.80918	5.57616e-10
203304_at	BAMBI	3.80874	1.37271e-10
201694_s_at	EGR1	3.80757	1.69609e-09
208923_at	CYFIP1	3.7658	9.20392e-10
226534_at	KITLG	3.76506	1.0131e-09
219863_at	HERC5	3.76269	4.22999e-09
220588_at	BCAS4	3.74378	1.09514e-11
204584_at	L1CAM	3.73272	2.4922e-08
214098_at	KIAA1107	3.72611	2.26503e-09
223523_at	TMEM108	3.71585	2.61617e-09
227048_at	LAMA1	3.68645	6.66993e-09
225575_at	LIFR	3.67945	4.3015e-10
204187_at	GMPR	3.66758	3.83384e-08
209685_s_at	PRKCB	3.66082	2.02427e-08
204114_at	NID2	3.63131	9.67995e-11
209859_at	TRIM9	3.62132	1.79313e-10
214091_s_at	GPX3	3.61752	1.40065e-09
209581_at	PLA2G16	3.61323	2.89384e-08
227997_at	IL17RD	3.60407	2.10358e-08
219557_s_at	NRIP3	3.60382	1.35175e-07
220979_s_at	ST6GALNAC5	3.59328	1.48291e-06
213256_at	MARCH3	3.57919	1.06428e-09
204446_s_at	ALOX5	3.57907	5.91956e-08
1562484_at	MEIOC	3.57617	1.77135e-08
218723_s_at	RGCC	3.56859	1.73929e-07
230964_at	FREM2	3.56192	4.15602e-09
206841_at	PDE6H	3.55513	1.94839e-07
233305_at	NECAB1	3.55501	8.63966e-08
227148_at	PLEKHH2	3.54977	2.45939e-10
229963_at	BEX5	3.51027	8.45223e-09
223402_at	DUSP23	3.50605	3.43956e-08
227014_at	ASPHD2	3.50234	1.04714e-09
202073_at	OPTN	3.48075	2.45939e-10
240801_at	LINC01549	3.46516	1.24406e-10
229484_at	PPM1J	3.44737	1.07982e-10
203440_at	CDH2	3.40217	6.02794e-10
226597_at	REEP6	3.38051	6.0901e-09
214247_s_at	DKK3	3.37354	2.1733e-09
203518_at	LYST	3.36364	7.17767e-08
227911_at	ARHGAP28	3.35445	2.91839e-09
210480_s_at	MYO6	3.34746	2.45939e-10
1555733_s_at	AP1S3	3.34243	6.26752e-10
217522_at	KCNV2	3.33419	1.28961e-05
211043_s_at	CLTB	3.31593	3.38077e-11
235144_at	RASEF	3.28686	1.29216e-07
230720_at	RNF182	3.27978	5.48218e-07
227803_at	ENPP5	3.27546	1.95067e-08
215321_at	RUNDC3B	3.27502	1.38105e-10
202022_at	ALDOC	3.26804	2.53441e-10
209087_x_at	MCAM	3.25482	3.74188e-07
214298_x_at	SEPT6	3.25293	4.8971e-10
213558_at	PCLO	3.25209	2.65872e-11
206671_at	SAG	3.24607	4.43987e-07
202260_s_at	STXBP1	3.23985	1.29209e-09
218872_at	TESC	3.23975	2.53007e-10
204540_at	EEF1A2	3.23966	2.17483e-07
220161_s_at	EPB41L4B	3.23906	8.91202e-09
223044_at	SLC40A1	3.22971	2.21673e-08
242592_at	GPR137C	3.19767	2.52688e-09
203562_at	FEZ1	3.18768	7.20081e-08
222927_s_at	CPLX3	3.18644	9.50885e-08
201549_x_at	KDM5B	3.18406	4.90431e-09
208965_s_at	IFI16	3.17243	0.000274969
222881_at	HPSE	3.16755	1.75839e-06
202766_s_at	FBN1	3.16088	9.98598e-10
204669_s_at	RNF24	3.15821	1.09514e-11
209343_at	EFHD1	3.14908	2.167e-08
235299_at	SLC41A2	3.14006	1.88832e-10
227761_at	MYO5A	3.13279	4.5635e-09
229930_at	LINC01315	3.13137	2.65872e-11
206401_s_at	MAPT	3.1285	5.85806e-09
202007_at	NID1	3.12468	4.85842e-06
227752_at	SPTLC3	3.12278	3.48215e-10
201579_at	FAT1	3.12193	1.83408e-08
204671_s_at	ANKRD6	3.11983	5.80653e-09
209301_at	CA2	3.10143	1.94249e-09
232038_at	TBC1D32	3.09814	7.6102e-09
228716_at	THRB	3.09365	4.76853e-10
36711_at	MAFF	3.08582	1.96805e-07
227123_at	RAB3B	3.07646	3.56507e-10
212464_s_at	FN1	3.06824	2.11652e-10
229649_at	NRXN3	3.06177	2.69182e-09
1553158_at	CEP19	3.05536	4.23063e-10
231192_at	LPAR3	3.05455	1.10248e-07
203936_s_at	MMP9	3.05334	1.24549e-08
239835_at	KBTBD8	3.04692	2.53935e-08
238441_at	PRKAA2	3.04186	1.30188e-07
211478_s_at	DPP4	3.03082	3.4084e-07
238846_at	TNFRSF11A	3.02915	1.43818e-08
201578_at	PODXL	3.022	1.7161e-09
214040_s_at	GSN	3.01934	1.03987e-10
218368_s_at	TNFRSF12A	3.01398	5.68964e-09
227760_at	IGFBPL1	3.01233	1.05787e-06
207265_s_at	KDELR3	3.00425	4.01046e-10
226185_at	CDS1	2.99513	3.56507e-10
209529_at	PLPP2	2.97737	4.2383e-11
212070_at	ADGRG1	2.97683	5.5852e-10
224367_at	BEX2	2.97492	1.43205e-10
219737_s_at	PCDH9	2.97414	6.39328e-08
203157_s_at	GLS	2.96561	3.2024e-09
235146_at	TMCC3	2.96456	1.21335e-06
211555_s_at	GUCY1B1	2.96068	2.67705e-09
225817_at	CGNL1	2.95918	1.38501e-09
236656_s_at	LOC100288911	2.95533	1.34905e-10
205113_at	NEFM	2.95493	5.74406e-08
204081_at	NRGN	2.95257	3.80808e-09
235874_at	PRSS35	2.94476	3.83948e-07
229290_at	DAPL1	2.9343	5.21456e-08
228375_at	IGSF11	2.9339	1.51795e-07
219992_at	TAC3	2.93048	8.59336e-07
220030_at	STYK1	2.92227	5.65585e-09
228320_x_at	BICDL1	2.91408	4.09747e-07
236313_at	CDKN2B	2.91366	1.8795e-10
219287_at	KCNMB4	2.91205	1.59236e-08
225626_at	PAG1	2.9094	4.56174e-09
202912_at	ADM	2.90797	1.70525e-08
223734_at	MGARP	2.89599	4.80518e-07
219143_s_at	RPP25	2.89279	4.43277e-09
202668_at	EFNB2	2.87929	1.98347e-06
219478_at	WFDC1	2.87544	4.11497e-08
239468_at	MKX	2.87013	6.93924e-08
205942_s_at	ACSM3	2.86734	2.01694e-09
204684_at	NPTX1	2.86426	5.09602e-06
204465_s_at	INA	2.86367	1.38276e-09
201739_at	SGK1	2.8603	9.1697e-10
218501_at	ARHGEF3	2.8487	3.50286e-10
225325_at	MFSD6	2.84299	1.18135e-09
231325_at	UNC5D	2.83385	3.79015e-09
205128_x_at	PTGS1	2.82643	2.03184e-08
213238_at	ATP10D	2.8122	1.24406e-10
229656_s_at	EML6	2.81123	6.94074e-08
210075_at	MARCH2	2.80975	3.57321e-08
216044_x_at	FAM69A	2.8017	1.34564e-10
218792_s_at	BSPRY	2.7745	4.8971e-10
241367_at	TEX19	2.77141	2.53409e-07
203065_s_at	CAV1	2.75957	1.31019e-07
225511_at	GPRC5B	2.75612	2.8778e-10
210432_s_at	SCN3A	2.75151	4.6542e-08
213664_at	SLC1A1	2.75117	1.61747e-07
229461_x_at	NEGR1	2.751	3.62546e-06
202990_at	PYGL	2.73899	1.12044e-08
224952_at	TANC2	2.72757	1.6951e-09
213847_at	PRPH	2.72684	1.105e-08
226306_at	SMIM29	2.72188	7.10609e-09
226322_at	TMTC1	2.71917	2.29027e-06
235046_at	INPP4B	2.7089	5.24099e-10
212830_at	MEGF9	2.70406	1.92014e-10
206140_at	LHX2	2.69899	1.38007e-06
228063_s_at	NAP1L5	2.69866	9.04554e-10
223719_s_at	RTBDN	2.6967	1.03839e-05
223075_s_at	AIF1L	2.6935	3.37578e-10
220358_at	BATF3	2.68944	3.10915e-08
219355_at	CXorf57	2.68441	4.92908e-07
209197_at	SYT11	2.6739	2.12306e-07
210117_at	SPAG1	2.67077	6.95774e-07
207107_at	RPE65	2.66656	4.87878e-07
211006_s_at	KCNB1	2.66373	9.37646e-05
223530_at	TDRKH	2.65802	7.25766e-07
215767_at	ZNF804A	2.64465	1.04987e-06
203349_s_at	ETV5	2.64262	0.000821979
205904_at	MICA	2.63906	3.43897e-07
219987_at	ERVMER34-1	2.63807	3.43956e-08
204105_s_at	NRCAM	2.63415	2.45939e-10
200872_at	S100A10	2.6278	8.20115e-05
53720_at	C19orf66	2.62756	8.69818e-09
219370_at	RPRM	2.61812	2.45489e-08
201050_at	PLD3	2.61655	4.01046e-10
231102_at	CROT	2.61609	5.5852e-10
1564220_a_at	LINC01234	2.6125	1.69097e-08
201150_s_at	TIMP3	2.61233	6.05665e-09
235518_at	SLC8A1	2.59709	3.25296e-06
202890_at	MAP7	2.58752	9.91565e-09
200904_at	HLA-E	2.58683	2.45939e-10
203823_at	RGS3	2.58528	6.46884e-09
221766_s_at	FAM46A	2.58163	3.43285e-10
210785_s_at	THEMIS2	2.58005	1.31747e-07
217165_x_at	MT1F	2.57416	4.696e-10
241998_at	C2orf80	2.56394	4.62646e-07
201952_at	ALCAM	2.56301	8.37718e-10
213075_at	OLFML2A	2.56138	1.68831e-07
228802_at	RBPMS2	2.56121	8.50928e-08
240194_at	LOC441204	2.5612	9.37284e-08
209276_s_at	GLRX	2.55846	1.36487e-08
226751_at	CNRIP1	2.55748	2.59096e-09
225847_at	NCEH1	2.55233	6.4029e-08
202191_s_at	GAS7	2.55124	0.00290205
207761_s_at	METTL7A	2.54759	2.91252e-07
213361_at	TDRD7	2.54655	9.62544e-08
238681_at	GDPD1	2.53579	1.69477e-09
45288_at	ABHD6	2.53446	1.09514e-11
200704_at	LITAF	2.53265	1.16321e-09
219170_at	FSD1	2.5275	1.29635e-09
201141_at	GPNMB	2.52695	6.99251e-06
202815_s_at	HEXIM1	2.52289	7.59764e-11
226338_at	PIP4P2	2.51972	1.63902e-08
203633_at	CPT1A	2.51759	3.07928e-08
232000_at	TTC39B	2.51726	4.09917e-08
206145_at	RHAG	2.51448	9.65834e-05
205493_s_at	DPYSL4	2.51357	1.69347e-06
221969_at	PAX5	2.5129	1.88641e-07
208992_s_at	STAT3	2.50491	1.37849e-09
204224_s_at	GCH1	2.5026	1.90357e-09
209201_x_at	CXCR4	2.50084	1.38594e-08
222354_at	F11R	2.48792	1.79309e-09
205970_at	MT3	2.48767	1.75983e-06
214719_at	SLC46A3	2.48758	1.81533e-06
207214_at	SPINK4	2.48721	5.15117e-06
203522_at	CCS	2.48106	8.88713e-10
215785_s_at	CYFIP2	2.48096	1.36742e-07
228653_at	SAMD5	2.47665	5.29498e-06
241672_at	SERTM1	2.47048	3.42173e-05
209193_at	PIM1	2.46274	1.19889e-08
221563_at	DUSP10	2.46157	4.58467e-07
218332_at	BEX1	2.46124	4.23063e-10
227484_at	SRGAP1	2.45877	2.56909e-06
1558195_at	LINC00592	2.45823	6.75422e-08
221581_s_at	LAT2	2.45717	6.37747e-08
205773_at	CPEB3	2.4549	4.16468e-09
237513_at	PRSS58	2.45258	7.06753e-07
224989_at	SMIM14	2.45228	1.30457e-07
229376_at	PROX1	2.44924	6.78193e-10
221008_s_at	ETNPPL	2.4488	2.44211e-07
200884_at	CKB	2.44472	3.94329e-07
204273_at	EDNRB	2.43947	3.73223e-07
213467_at	RND2	2.4387	6.87529e-08
219326_s_at	B3GNT2	2.4357	4.3119e-07
227420_at	TNFAIP8L1	2.43564	1.73774e-07
225864_at	FAM84B	2.43378	4.83702e-11
219195_at	PPARGC1A	2.43217	3.92599e-08
208096_s_at	COL21A1	2.42263	3.19844e-07
227193_at	SLC30A4	2.41768	1.28201e-08
206176_at	BMP6	2.41424	1.70508e-08
232422_at	GGACT	2.41419	4.90745e-07
209822_s_at	VLDLR	2.41331	1.02858e-06
214586_at	GPR37	2.412	2.16852e-07
226459_at	PIK3AP1	2.40937	1.46714e-09
238755_at	RASSF10	2.40071	2.67996e-07
213272_s_at	TMEM159	2.40039	3.84374e-10
229778_at	SPX	2.39962	4.80662e-09
226237_at	COL8A1	2.39558	0.000384285
230831_at	FRMD5	2.3922	2.29027e-06
204922_at	C11orf80	2.38767	3.44977e-07
204519_s_at	PLLP	2.3872	7.52208e-06
206067_s_at	WT1	2.38654	6.84649e-08
219728_at	MYOT	2.38389	0.000383205
229497_at	ANKDD1A	2.38205	5.58657e-07
238727_at	LOC440934	2.38035	1.50261e-07
218282_at	EDEM2	2.37896	5.05632e-09
201242_s_at	ATP1B1	2.37547	3.8432e-11
213135_at	TIAM1	2.37196	4.55771e-08
210240_s_at	CDKN2D	2.3684	8.69297e-07
202743_at	PIK3R3	2.36673	2.20558e-09
231727_s_at	MIF4GD	2.36571	3.48776e-07
218573_at	MAGEH1	2.36291	5.39138e-08
205382_s_at	CFD	2.35707	1.06714e-07
206363_at	MAF	2.35594	0.000244817
225344_at	NCOA7	2.35447	3.14648e-08
205555_s_at	MSX2	2.35116	9.36142e-10
228335_at	CLDN11	2.35064	2.18876e-09
227688_at	LRCH2	2.35057	1.09112e-07
209644_x_at	CDKN2A	2.34943	9.03315e-08
213201_s_at	TNNT1	2.34434	1.52624e-06
227021_at	KDM1B	2.34055	1.75712e-08
205031_at	EFNB3	2.33893	4.35238e-08
227370_at	FAM171B	2.33617	7.72255e-11
204471_at	GAP43	2.33451	2.23285e-06
230067_at	FAM124A	2.32742	1.50671e-08
203713_s_at	LLGL2	2.32213	9.83698e-09
209019_s_at	PINK1	2.32098	2.7456e-10
242054_s_at	SIX3	2.31933	7.17767e-08
202729_s_at	LTBP1	2.31475	4.90731e-08
204254_s_at	VDR	2.3087	1.26086e-08
213222_at	PLCB1	2.30573	2.67696e-09
202693_s_at	STK17A	2.30547	7.66547e-11
228262_at	MAP7D2	2.29929	2.05919e-06
212614_at	ARID5B	2.29507	8.7593e-08
205780_at	BIK	2.29257	2.37801e-08
226186_at	TMOD2	2.2909	1.43205e-10
222572_at	PDP1	2.28514	3.39059e-09
222456_s_at	LIMA1	2.28313	4.43639e-07
223322_at	RASSF5	2.28176	1.49801e-07
214993_at	ASPHD1	2.27935	2.85799e-09
229285_at	RNASEL	2.27648	6.3163e-07
203379_at	RPS6KA1	2.27613	1.14745e-08
221210_s_at	NPL	2.27517	6.73964e-11
205352_at	SERPINI1	2.27311	3.00021e-07
244461_at	SPECC1	2.27065	1.62785e-07
212647_at	RRAS	2.26981	7.24515e-09
231991_at	CCM2L	2.25993	7.32852e-07
225355_at	NEURL1B	2.25826	1.28292e-05
204472_at	GEM	2.24749	0.000231743
207786_at	CYP2R1	2.24597	2.81306e-08
202672_s_at	ATF3	2.24529	1.52885e-05
209670_at	TRAC	2.23769	0.000186763
203476_at	TPBG	2.23429	1.59026e-07
220435_at	SLC30A10	2.23162	1.36529e-05
226982_at	ELL2	2.23135	6.40063e-09
212736_at	C16orf45	2.23109	8.36907e-08
206089_at	NELL1	2.22815	6.16966e-05
200986_at	SERPING1	2.22549	1.95516e-09
227176_at	SLC2A13	2.22277	2.99888e-07
229553_at	PGM2L1	2.22132	5.34785e-10
212338_at	MYO1D	2.21977	5.85969e-06
204722_at	SCN3B	2.21933	1.16321e-09
204279_at	PSMB9	2.2171	1.42549e-08
213933_at	PTGER3	2.21678	6.86198e-05
204748_at	PTGS2	2.21638	1.28959e-05
218380_at	LOC728392	2.20857	1.68831e-07
227177_at	CORO2A	2.20222	2.59638e-07
226510_at	HEATR5A	2.20106	2.0796e-06
231406_at	ORAI2	2.19754	2.2875e-07
211573_x_at	TGM2	2.19686	3.33913e-07
232914_s_at	SYTL2	2.19119	3.43897e-07
216092_s_at	SLC7A8	2.1892	2.65272e-07
214823_at	ZNF204P	2.18906	2.69312e-07
242286_at	GRIN2A	2.18313	3.12859e-06
224836_at	TP53INP2	2.1813	4.97943e-07
210933_s_at	FSCN1	2.18057	2.8778e-10
37549_g_at	BBS9	2.17814	6.82359e-07
202187_s_at	PPP2R5A	2.16939	3.23883e-10
218676_s_at	PCTP	2.16791	1.38917e-07
211959_at	IGFBP5	2.16591	1.55421e-05
242006_at	LCA5	2.16518	3.05079e-06
213906_at	MYBL1	2.16326	4.41284e-07
212998_x_at	HLA-DQB1	2.15973	1.95919e-09
232549_at	RBM11	2.15731	5.6802e-07
208886_at	H1F0	2.15676	1.35817e-08
222835_at	THSD4	2.15174	1.70144e-05
218574_s_at	LMCD1	2.15013	1.21544e-06
225812_at	FAM229B	2.14944	1.15349e-07
203407_at	PPL	2.14385	3.29095e-05
202363_at	SPOCK1	2.14321	7.6102e-09
227347_x_at	HES4	2.1429	2.76416e-06
223441_at	SLC17A5	2.13752	1.01943e-08
232235_at	DSEL	2.13126	1.83688e-08
226782_at	SLC25A30	2.13081	2.30945e-08
205646_s_at	PAX6	2.13009	1.42303e-07
220244_at	LINC00312	2.1218	1.72707e-05
219671_at	HPCAL4	2.12178	1.45601e-05
224559_at	MALAT1	2.12033	9.98373e-07
209706_at	NKX3-1	2.11585	4.32385e-07
1552727_s_at	ADAMTS17	2.10991	3.43208e-05
232553_at	PCYT1B	2.10813	2.19989e-08
203680_at	PRKAR2B	2.10792	4.24952e-06
241368_at	PLIN5	2.10563	5.87513e-05
223266_at	STRADB	2.10389	1.36003e-08
208949_s_at	LGALS3	2.10379	1.58705e-09
214169_at	SUN1	2.10262	3.29823e-07
205559_s_at	PCSK5	2.10226	9.96024e-08
205852_at	CDK5R2	2.10143	1.82283e-07
221156_x_at	CCPG1	2.09723	1.37696e-07
219825_at	CYP26B1	2.09721	1.87629e-06
213436_at	CNR1	2.09532	5.5634e-06
1552445_a_at	ESX1	2.09414	5.09602e-06
235948_at	RIMKLA	2.09412	1.67754e-08
220945_x_at	MANSC1	2.09338	3.25354e-08
235197_s_at	OSTM1	2.09166	7.73853e-09
230464_at	S1PR5	2.0883	1.02471e-08
243256_at	MKNK1	2.08545	1.74567e-09
201565_s_at	ID2	2.08449	8.6152e-07
209457_at	DUSP5	2.08374	2.87568e-08
204073_s_at	MYRF	2.08269	9.51584e-07
204897_at	PTGER4	2.08165	9.93357e-05
213587_s_at	ATP6V0E2	2.07984	2.77979e-08
227983_at	RILPL2	2.0739	5.32427e-09
205259_at	NR3C2	2.07231	5.61645e-07
230769_at	DENND2C	2.07081	1.57603e-06
202598_at	S100A13	2.06855	1.32321e-06
242447_at	C3orf70	2.06716	6.06315e-06
227840_at	C2orf76	2.06304	3.70648e-07
209189_at	FOS	2.05927	2.75338e-07
1556037_s_at	HHIP	2.05813	2.43674e-06
202122_s_at	PLIN3	2.05667	1.34564e-10
208934_s_at	LGALS8	2.04925	1.88833e-08
205348_s_at	DYNC1I1	2.04885	4.73893e-07
214763_at	ACOT11	2.0488	2.42035e-07
238121_at	GK5	2.04628	3.74188e-07
235737_at	TSLP	2.04182	2.00284e-09
205150_s_at	TRIL	2.04058	4.62712e-06
226208_at	ZSWIM6	2.03921	1.43853e-06
218503_at	FOCAD	2.03823	2.57423e-09
207826_s_at	ID3	2.03768	5.12836e-08
203001_s_at	STMN2	2.03635	0.000663176
216080_s_at	FADS3	2.03509	4.66561e-08
219574_at	MARCH1	2.03319	2.18779e-09
208297_s_at	EVI5	2.03272	4.89952e-09
220937_s_at	ST6GALNAC4	2.03249	6.40549e-10
228461_at	SH3RF3	2.03131	1.37188e-06
233238_s_at	LINC01933	2.03102	9.91835e-06
207057_at	SLC16A7	2.02982	1.39976e-06
229559_at	PPM1N	2.02843	1.66382e-08
213943_at	TWIST1	2.02688	8.03116e-08
228087_at	CCDC126	2.02375	2.18155e-08
233320_at	TCAM1P	2.02372	1.10891e-06
223660_at	ADORA3	2.02137	5.91247e-10
218693_at	TSPAN15	2.02102	6.67969e-09
224746_at	KIAA1522	2.01871	5.40424e-09
222549_at	CLDN1	2.01689	4.66319e-07
205551_at	SV2B	2.01564	5.49462e-09
208926_at	NEU1	2.0076	1.51463e-08
208216_at	DLX4	2.0042	2.59613e-08
208180_s_at	HIST1H4H	2.00271	3.42814e-06
204379_s_at	FGFR3	2.00018	0.000232166
213927_at	MAP3K9	1.99648	1.09268e-08
223471_at	RAB3IP	1.99382	1.95239e-10
220941_s_at	C21orf91	1.99097	6.42678e-08
219077_s_at	WWOX	1.98836	3.32912e-09
202508_s_at	SNAP25	1.98778	4.59821e-08
203381_s_at	APOE	1.98647	1.01454e-08
207574_s_at	GADD45B	1.98553	1.72509e-08
1552519_at	ACVR1C	1.98429	2.2939e-07
227812_at	TNFRSF19	1.98171	2.14272e-06
211990_at	HLA-DPA1	1.9817	9.91835e-06
222240_s_at	ISYNA1	1.97631	1.4602e-08
204168_at	MGST2	1.97558	2.78979e-06
228153_at	RNF144B	1.97481	3.47332e-06
225726_s_at	PLEKHH1	1.97315	5.68964e-09
218404_at	SNX10	1.95991	1.57372e-08
235736_at	SMKR1	1.95707	1.21335e-06
208581_x_at	MT1X	1.95504	5.32133e-10
210842_at	NRP2	1.95468	0.000102015
206858_s_at	HOXC6	1.95127	8.67384e-08
212699_at	SCAMP5	1.95009	1.88251e-07
225536_at	TMEM54	1.94995	2.00284e-09
209589_s_at	EPHB2	1.949	1.03174e-06
202180_s_at	MVP	1.9479	6.74137e-07
221218_s_at	TPK1	1.94594	5.36024e-06
225898_at	WDR54	1.94469	1.40855e-10
206669_at	GAD1	1.94265	3.54834e-09
204164_at	SIPA1	1.94228	1.39244e-07
203855_at	WDR47	1.9331	4.16468e-09
227038_at	SGMS2	1.93227	2.58155e-07
205440_s_at	NPY1R	1.93223	2.96089e-05
226499_at	NRARP	1.92737	7.64874e-06
225123_at	SESN3	1.92673	1.62373e-07
241833_at	PEX5L	1.91728	5.66479e-09
223136_at	AIG1	1.91489	1.7306e-06
205486_at	TESK2	1.91418	8.41392e-08
235301_at	KIAA1324L	1.90993	1.64407e-08
202149_at	NEDD9	1.90906	3.88283e-06
226282_at	PTPN14	1.90181	2.94483e-08
218651_s_at	LARP6	1.90086	5.36013e-08
205290_s_at	BMP2	1.89883	2.02994e-08
209824_s_at	ARNTL	1.89557	8.12774e-06
218953_s_at	PCYOX1L	1.89528	5.46099e-06
200618_at	LASP1	1.89515	2.73846e-09
203323_at	CAV2	1.89441	3.61098e-06
208891_at	DUSP6	1.88799	4.73269e-05
222784_at	SMOC1	1.88732	1.04847e-07
212190_at	SERPINE2	1.88357	1.10513e-10
204484_at	PIK3C2B	1.88137	4.9592e-07
225755_at	KLHDC8B	1.88114	1.24616e-08
225252_at	SRXN1	1.87769	5.85053e-09
224596_at	SLC44A1	1.87745	3.51282e-11
216438_s_at	TMSB4X	1.87476	3.4801e-10
213093_at	PRKCA	1.87257	3.79145e-05
225681_at	CTHRC1	1.87201	3.87203e-06
211093_at	PDE6C	1.87178	0.00258843
226814_at	ADAMTS9	1.86792	0.00011387
236835_at	FUT8-AS1	1.86707	1.25948e-06
211028_s_at	KHK	1.86594	1.94106e-07
213107_at	TNIK	1.86438	1.73755e-07
202820_at	AHR	1.86385	1.35935e-08
209159_s_at	NDRG4	1.86153	6.46284e-06
226372_at	CHST11	1.85866	1.44919e-07
209803_s_at	PHLDA2	1.85855	2.21394e-05
208937_s_at	ID1	1.85535	3.88903e-07
227492_at	OCLN	1.85474	1.50839e-06
219747_at	NDNF	1.85368	1.63248e-09
219475_at	OSGIN1	1.84438	2.66983e-05
218164_at	SPATA20	1.84349	3.92464e-08
232827_at	LOC101929188	1.84303	1.02562e-06
209487_at	RBPMS	1.84163	9.44715e-07
228368_at	ARHGAP20	1.84119	6.65816e-05
235413_at	GGCX	1.84006	1.88833e-08
203271_s_at	UNC119	1.83795	3.77836e-05
222912_at	ARRB1	1.836	9.5039e-07
230900_at	CCDC110	1.82838	7.80259e-06
227268_at	RNFT1	1.82812	6.41097e-08
239572_at	GJA3	1.82484	5.16993e-07
202023_at	EFNA1	1.8241	3.80122e-05
203710_at	ITPR1	1.82019	5.62424e-07
202951_at	STK38	1.81871	1.1353e-08
232305_at	HMGCLL1	1.81453	4.81667e-06
221004_s_at	ITM2C	1.81427	1.48454e-10
1552365_at	SCIN	1.81099	1.81406e-06
225056_at	SIPA1L2	1.81063	8.10237e-09
1570253_a_at	RHEBL1	1.8093	2.42234e-07
205899_at	CCNA1	1.80888	1.05325e-05
209380_s_at	ABCC5	1.80451	1.69574e-09
235143_at	SLC10A7	1.80286	1.78506e-06
1564002_a_at	AK9	1.80085	5.79534e-06
212314_at	SEL1L3	1.79617	7.31773e-09
202910_s_at	ADGRE5	1.79506	1.0138e-05
205008_s_at	CIB2	1.79486	1.24164e-07
202421_at	IGSF3	1.7927	2.7923e-08
240806_at	RPL15	1.79152	2.88389e-07
209101_at	CTGF	1.78886	0.000250338
207147_at	DLX2	1.78804	2.10581e-06
201590_x_at	ANXA2	1.78445	1.1913e-06
1570156_s_at	FMN1	1.78056	7.3091e-07
226625_at	TGFBR3	1.77816	3.331e-09
1569039_s_at	ZNF677	1.77775	4.67526e-06
207899_at	GIP	1.77667	5.66428e-07
206461_x_at	MT1H	1.77457	3.00889e-10
209140_x_at	HLA-B	1.77414	5.34785e-10
215425_at	BTG3	1.77242	1.8528e-07
219382_at	SERTAD3	1.77199	5.90468e-08
203997_at	PTPN3	1.77096	9.92867e-06
213115_at	ATG4A	1.77016	1.55838e-06
200701_at	NPC2	1.76901	9.98598e-10
218802_at	MCUB	1.7678	3.25354e-08
228855_at	NUDT7	1.7676	7.98861e-11
232760_at	TEX15	1.76688	1.00658e-06
236738_at	C3orf80	1.76591	7.01128e-07
221794_at	DOCK6	1.76573	5.26687e-09
225001_at	RAB3D	1.76318	2.28403e-08
215843_s_at	TLL2	1.76264	3.0952e-05
230033_at	DNAAF3	1.76035	1.27016e-07
202085_at	TJP2	1.75957	1.24725e-07
228411_at	PARD3B	1.75849	0.000464255
224901_at	SCD5	1.74942	5.09577e-08
1562639_at	KIF6	1.74936	0.000506705
235273_at	DNAAF4	1.74903	7.92374e-05
202794_at	INPP1	1.74686	2.41e-08
212185_x_at	MT2A	1.74627	1.59888e-09
208345_s_at	POU3F1	1.74434	5.00711e-07
224724_at	SULF2	1.74427	5.94993e-09
220690_s_at	DHRS7B	1.74417	3.66265e-09
213750_at	RSL1D1	1.74373	1.23178e-09
223394_at	SERTAD1	1.73811	2.18991e-06
204451_at	FZD1	1.73477	4.4497e-06
228422_at	LHFPL4	1.73427	1.64089e-06
230275_at	ARSI	1.72862	2.64672e-06
238575_at	OSBPL6	1.72547	2.7456e-10
231823_s_at	SH3PXD2B	1.72178	4.41284e-07
211456_x_at	MT1HL1	1.7214	5.86401e-10
230418_s_at	GALNT16	1.72004	3.72982e-10
226358_at	APH1B	1.71885	1.24595e-08
208812_x_at	HLA-C	1.71822	1.18135e-09
220761_s_at	TAOK3	1.71638	1.52784e-07
206907_at	TNFSF9	1.71521	7.38991e-05
212701_at	TLN2	1.71377	1.3358e-06
210445_at	FABP6	1.71158	1.3361e-07
202284_s_at	CDKN1A	1.70853	5.03781e-07
240490_at	LOC101929592	1.70798	0.000437293
225327_at	FAM214A	1.70314	1.99993e-08
1566080_at	LOC100505534	1.70303	2.08063e-05
228660_x_at	SEMA4F	1.70254	3.28904e-06
232579_at	KDM7A-DT	1.70097	1.88547e-06
1553037_a_at	SYN2	1.69867	4.96861e-08
227468_at	CPT1C	1.69595	9.17716e-08
204469_at	PTPRZ1	1.69572	9.00189e-06
243610_at	C9orf135	1.69523	3.76779e-06
235733_at	GXYLT2	1.69457	1.71564e-07
210683_at	NRTN	1.69156	5.57177e-06
205483_s_at	ISG15	1.69156	4.18581e-06
236915_at	C4orf47	1.69123	4.87115e-06
225900_at	EXOC6B	1.68847	1.99497e-06
202719_s_at	TES	1.68712	5.64726e-07
205110_s_at	FGF13	1.68677	7.49191e-06
226354_at	LACTB	1.68459	7.98726e-10
1558322_a_at	PAQR9	1.6839	5.6941e-07
224329_s_at	CNFN	1.68343	4.83245e-08
227425_at	REPS2	1.68063	5.67655e-07
201596_x_at	KRT18	1.67	2.8655e-05
235751_s_at	VMO1	1.66903	0.0101891
1558846_at	PNLIPRP3	1.66772	1.85889e-07
235852_at	STON2	1.66683	1.39748e-06
227565_at	KLHL5	1.66651	5.05618e-10
209568_s_at	RGL1	1.66313	7.26268e-06
213497_at	ABTB2	1.66309	1.3423e-08
202793_at	LPCAT3	1.66203	1.14312e-08
218876_at	TPPP3	1.65619	2.23124e-06
228959_at	PDK3	1.65386	1.67962e-08
228439_at	BATF2	1.65128	1.53071e-07
1554106_at	NBEAL1	1.65046	6.85274e-09
221269_s_at	SH3BGRL3	1.64823	1.59075e-06
209504_s_at	PLEKHB1	1.64714	3.58871e-09
221875_x_at	HLA-F	1.64647	2.11652e-10
230487_at	C6orf99	1.64287	3.23385e-07
225955_at	METRNL	1.64073	4.02262e-05
220658_s_at	ARNTL2	1.63979	3.28802e-07
220631_at	OSGEPL1	1.63978	7.70594e-09
203185_at	RASSF2	1.63658	0.000202811
212686_at	PPM1H	1.63517	9.86399e-07
204398_s_at	EML2	1.63365	1.68831e-07
230075_at	RAB39B	1.63222	1.23063e-06
212733_at	RUBCN	1.63182	1.02494e-08
214433_s_at	SELENBP1	1.62964	1.13228e-06
218807_at	VAV3	1.6296	9.75479e-09
218394_at	ROGDI	1.62633	2.82611e-06
200660_at	S100A11	1.62477	2.21374e-07
202662_s_at	ITPR2	1.62066	3.52699e-06
209536_s_at	EHD4	1.61994	1.24595e-08
232242_at	PTPRG-AS1	1.61881	7.26481e-05
238065_at	TPM3	1.61683	2.84997e-08
1556351_at	HCN1	1.61649	1.70633e-07
203934_at	KDR	1.61528	1.11413e-07
219773_at	NOX4	1.61284	1.59911e-06
209904_at	TNNC1	1.61064	0.000178723
209652_s_at	PGF	1.61058	2.6346e-05
235990_at	LOC100130987	1.61021	1.44555e-05
207869_s_at	CACNA1G	1.60833	2.43992e-08
201995_at	EXT1	1.60774	1.53112e-07
231040_at	RORB	1.60526	5.41805e-07
229638_at	IRX3	1.60405	2.7418e-05
224048_at	USP44	1.60305	7.25107e-06
202609_at	EPS8	1.60087	6.61444e-08
226167_at	SYT7	1.59897	1.04213e-05
203636_at	MID1	1.5981	6.5631e-07
204140_at	TPST1	1.59598	4.49679e-07
1554132_a_at	CCSER2	1.59565	3.43956e-08
205531_s_at	GLS2	1.59271	3.95822e-05
204624_at	ATP7B	1.592	7.07885e-08
225316_at	MFSD2A	1.59094	2.34661e-07
1554539_a_at	RHOF	1.58958	1.38105e-09
201137_s_at	HLA-DPB1	1.58902	1.32954e-06
223340_at	ATL1	1.58877	7.7529e-07
203814_s_at	NQO2	1.5882	5.3738e-08
218813_s_at	SH3GLB2	1.58767	1.15309e-06
201015_s_at	JUP	1.58736	2.22829e-05
237282_s_at	AKAP14	1.58629	1.22664e-05
223232_s_at	CGN	1.58441	6.49479e-08
227182_at	SUSD3	1.58349	2.92946e-06
228031_at	TTPAL	1.58055	2.0747e-08
232269_x_at	METRN	1.57901	1.19614e-07
219884_at	LHX6	1.57687	3.56458e-05
212899_at	CDK19	1.57543	6.58034e-06
203675_at	NUCB2	1.57041	1.10985e-08
223449_at	SEMA6A	1.56874	1.15632e-07
222073_at	COL4A3	1.56858	0.00199038
236150_at	HYKK	1.56854	9.78809e-09
225762_x_at	RNA45SN5	1.56836	8.08734e-06
226878_at	HLA-DOA	1.56757	3.68865e-07
209220_at	GPC3	1.56482	8.33606e-09
208605_s_at	NTRK1	1.56457	0.000142437
31845_at	ELF4	1.56408	4.55771e-08
203225_s_at	RFK	1.56301	1.9017e-07
231358_at	MRO	1.5623	9.01308e-06
208869_s_at	GABARAPL1	1.56089	2.59177e-06
209911_x_at	HIST1H2BD	1.5596	2.36201e-05
205968_at	KCNS3	1.55936	6.75683e-08
203879_at	PIK3CD	1.55709	3.09436e-07
204479_at	OSTF1	1.55698	4.07683e-08
211474_s_at	SERPINB6	1.55489	1.45188e-07
211597_s_at	HOPX	1.55478	1.79018e-05
222745_s_at	KATNBL1	1.55345	2.79072e-08
227644_at	RIMS4	1.55265	4.5545e-05
231138_at	TRPC5OS	1.55252	0.00154979
224977_at	C6orf89	1.55231	2.56131e-08
203390_s_at	KIF3C	1.55184	3.84245e-07
225806_at	AJUBA	1.55032	0.000114243
226568_at	FAM102B	1.54699	1.86567e-08
211529_x_at	HLA-G	1.54511	4.6548e-09
239853_at	KLC3	1.54405	7.35054e-09
203650_at	PROCR	1.54387	1.36666e-09
213270_at	MPP2	1.54363	2.98871e-05
228255_at	TMEM237	1.54169	1.12283e-07
228574_at	TMTC2	1.54036	1.57443e-06
209118_s_at	TUBA1A	1.53888	2.8648e-09
209213_at	CBR1	1.53624	2.83288e-08
206197_at	NME5	1.53361	0.00040862
208359_s_at	KCNJ4	1.53249	0.000147833
204260_at	CHGB	1.53109	2.8739e-07
221900_at	COL8A2	1.53067	3.6168e-07
205575_at	C1QL1	1.5305	6.41741e-05
228151_at	ARL15	1.52909	3.72982e-10
218681_s_at	SDF2L1	1.52904	1.93912e-08
201954_at	ARPC1B	1.52902	4.7484e-08
210605_s_at	MFGE8	1.52893	4.14556e-07
204702_s_at	NFE2L3	1.52809	1.3293e-09
208944_at	TGFBR2	1.52617	1.9703e-08
242719_at	RYBP	1.52575	3.92599e-08
227594_at	ZMYM6	1.52438	4.16695e-07
1554068_s_at	C12orf66	1.5233	6.86622e-07
228773_at	LOC100506100	1.52159	9.1895e-07
219718_at	FGGY	1.52101	2.45146e-06
218477_at	TMEM14A	1.52012	1.38276e-09
228581_at	KCNJ10	1.51768	5.18163e-06
226188_at	LGALSL	1.51702	3.1808e-09
229623_at	TMEM150C	1.51482	2.58656e-05
200600_at	MSN	1.51477	0.000139194
225835_at	SLC12A2	1.51319	3.82585e-08
231906_at	HOXD8	1.51201	6.02809e-06
213429_at	BICC1	1.51106	5.50839e-08
227558_at	CBX4	1.51098	2.59499e-06
209368_at	EPHX2	1.50962	1.81984e-07
231175_at	BEND6	1.50659	0.000998207
208626_s_at	VAT1	1.50651	1.27362e-05
218087_s_at	SORBS1	1.50577	2.15795e-05
218532_s_at	RETREG1	1.5043	0.000280026
210102_at	VWA5A	1.50203	2.27918e-06
210151_s_at	DYRK3	1.50164	3.71124e-07
203069_at	SV2A	1.50064	5.86546e-09
221260_s_at	CSRNP2	1.49659	2.53416e-06
227584_at	NAV1	1.49658	2.26421e-09
236718_at	MYO10	1.49592	5.23416e-06
203498_at	RCAN2	1.49478	0.000570641
208637_x_at	ACTN1	1.49438	2.26631e-09
232341_x_at	HABP4	1.49425	6.64884e-09
205309_at	SMPDL3B	1.4928	9.32038e-08
223694_at	TRIM7	1.49266	1.91488e-06
218974_at	SOBP	1.49237	6.93074e-06
209369_at	ANXA3	1.4914	3.89971e-05
214319_at	FRY	1.48907	2.81195e-05
223749_at	C1QTNF2	1.48871	1.60094e-06
203988_s_at	FUT8	1.48783	3.01349e-09
222780_s_at	BAALC	1.48737	1.83408e-08
203395_s_at	HES1	1.48673	1.27583e-07
223179_at	YPEL3	1.48366	3.76228e-08
226548_at	SBK1	1.48257	2.17886e-06
219877_at	ZMAT4	1.48184	5.50719e-07
203671_at	TPMT	1.4818	1.05651e-06
1556308_at	PRRT3	1.48149	1.1439e-07
203586_s_at	ARL4D	1.48029	7.79462e-07
225207_at	PDK4	1.47945	0.00030142
221792_at	RAB6B	1.47849	4.60047e-06
202084_s_at	SEC14L1	1.47785	3.28154e-09
244660_at	ELAVL1	1.47723	2.37003e-07
1555112_a_at	CCDC181	1.47648	7.3342e-05
203028_s_at	CYBA	1.47634	4.75151e-05
226291_at	ALS2	1.47364	2.09516e-07
219155_at	PITPNC1	1.47249	1.41923e-07
212543_at	CRYBG1	1.46994	3.44385e-05
219676_at	ZSCAN16	1.46966	5.53485e-06
228661_s_at	LOC102606465	1.46867	0.00074672
1554600_s_at	LMNA	1.46849	5.09955e-06
1554016_a_at	USB1	1.46814	3.41813e-06
55065_at	MARK4	1.46694	3.01134e-08
228284_at	TLE1	1.46314	1.8738e-08
204661_at	CD52	1.4609	0.000180938
222062_at	IL27RA	1.46078	1.14256e-06
223312_at	PRADC1	1.46029	4.9354e-10
206196_s_at	RUNDC3A	1.4597	8.42751e-05
229579_s_at	DISP2	1.45957	1.30169e-06
238131_at	PHC2	1.45851	4.18355e-07
243802_at	DNAH12	1.45849	6.6148e-07
222742_s_at	IFT22	1.45842	7.94718e-08
205478_at	PPP1R1A	1.45793	6.38195e-06
203607_at	INPP5F	1.45704	1.14797e-06
212501_at	CEBPB	1.45425	7.0887e-08
223362_s_at	SEPT3	1.45391	1.53888e-07
218910_at	ANO10	1.45381	5.64355e-06
204283_at	FARS2	1.45333	2.55749e-05
206440_at	LIN7A	1.45302	0.000183828
204588_s_at	SLC7A7	1.45266	4.16787e-05
210147_at	ART3	1.45215	2.05113e-05
218952_at	PCSK1N	1.45175	1.58125e-05
221256_s_at	HDHD3	1.45083	9.51871e-08
201212_at	LGMN	1.45077	1.25316e-09
204612_at	PKIA	1.45062	3.0368e-08
204440_at	CD83	1.44905	0.000206659
203821_at	HBEGF	1.44815	2.01385e-05
229873_at	KCTD21	1.448	6.58253e-07
202638_s_at	ICAM1	1.44698	5.04617e-07
223386_at	FAM118B	1.44677	2.45902e-08
1560676_at	SIAH3	1.44486	3.48787e-06
1569796_s_at	ATRNL1	1.44444	1.80357e-09
201839_s_at	EPCAM	1.44367	5.90632e-07
243309_at	C15orf65	1.44323	0.000117776
232702_at	RABGAP1L	1.44128	5.82712e-06
204079_at	TPST2	1.44062	1.54995e-08
222847_s_at	EGLN3	1.43976	5.42842e-05
205280_at	GLRB	1.43692	5.3217e-08
1554168_a_at	SH3KBP1	1.4368	9.46817e-08
243364_at	AUTS2	1.43584	9.17117e-08
229518_at	FAM46B	1.43225	4.66233e-07
204124_at	SLC34A2	1.43019	0.00184038
206891_at	ACTN3	1.42982	0.000239024
230497_at	CELF5	1.42982	1.02663e-07
210130_s_at	TM7SF2	1.42925	5.6802e-07
207717_s_at	PKP2	1.42915	3.45971e-07
223218_s_at	NFKBIZ	1.4275	1.27868e-05
238511_at	UBL7-AS1	1.42618	5.00155e-07
203140_at	BCL6	1.42551	3.42588e-05
214769_at	CLCN4	1.42514	1.34917e-05
218546_at	C1orf115	1.42483	2.78634e-08
220493_at	DMRT1	1.42479	4.55925e-07
236115_at	HTR7P1	1.42343	2.40272e-06
206935_at	PCDH8	1.423	0.0361812
219518_s_at	ELL3	1.42282	5.24637e-07
213710_s_at	CALM1	1.42267	3.73624e-06
230687_at	SLC13A3	1.42064	5.78945e-06
203914_x_at	HPGD	1.42021	3.12867e-06
235334_at	ST6GALNAC3	1.42008	2.92147e-07
219688_at	BBS7	1.41931	3.76148e-08
229072_at	RAB30	1.41764	8.351e-06
202458_at	PRSS23	1.41573	8.01989e-06
220092_s_at	ANTXR1	1.41262	1.26378e-07
222129_at	RETREG2	1.4121	3.02568e-07
207443_at	NR2E1	1.41	2.45154e-07
211902_x_at	YME1L1	1.40999	0.000685448
204735_at	PDE4A	1.40886	8.90865e-06
209470_s_at	GPM6A	1.40821	1.47096e-07
228400_at	SHROOM3	1.40511	3.0477e-07
223917_s_at	SLC39A3	1.40065	2.32727e-09
228832_at	FLJ20021	1.40055	1.97977e-07
1560981_a_at	PPARA	1.40051	3.41322e-06
223309_x_at	PNPLA8	1.39931	1.72509e-08
1552521_a_at	TMEM74	1.39914	3.2024e-09
225003_at	TMEM205	1.39799	1.31278e-08
213172_at	TTC9	1.39747	4.57538e-06
203778_at	MANBA	1.39715	2.21047e-05
218857_s_at	ASRGL1	1.39695	8.87911e-09
216856_s_at	DLEU2	1.39671	5.42098e-05
207455_at	P2RY1	1.39376	0.0012909
226828_s_at	HEYL	1.39369	6.90759e-06
204745_x_at	MT1G	1.39345	2.46701e-08
1554352_s_at	DENND4A	1.3932	4.09333e-08
225273_at	WWC3	1.39174	1.32094e-06
219654_at	HACD1	1.39138	4.56262e-08
226811_at	FAM46C	1.39071	0.000902311
205569_at	LAMP3	1.38975	2.58342e-05
231656_x_at	OSBPL10	1.38407	2.75338e-07
1553268_at	RHBDL3	1.38275	5.71958e-07
225464_at	FRMD6	1.38259	9.1738e-09
218088_s_at	RRAGC	1.38189	1.60103e-09
213394_at	MAPKBP1	1.3809	5.64336e-07
224833_at	ETS1	1.37992	6.67969e-09
232244_at	MYORG	1.37897	2.56655e-05
209463_s_at	TAF12	1.3777	5.04541e-06
228427_at	FBXO16	1.37692	7.16785e-07
226728_at	SLC27A1	1.37637	1.0809e-06
208816_x_at	ANXA2P2	1.3755	4.64033e-06
226623_at	PHYHIPL	1.3744	2.80734e-06
1554321_a_at	NFS1	1.37171	6.16713e-08
204867_at	GCHFR	1.37095	6.88263e-06
228972_at	PITPNA-AS1	1.37067	1.97259e-08
201924_at	AFF1	1.36931	1.28927e-09
203861_s_at	ACTN2	1.36859	0.000667041
212810_s_at	SLC1A4	1.36777	2.58938e-05
229978_at	SHISA9	1.36773	0.000311555
213419_at	APBB2	1.36686	6.9579e-08
226039_at	MGAT4A	1.36333	3.78985e-05
233528_s_at	CASTOR1	1.36317	5.19526e-05
206100_at	CPM	1.36264	1.2553e-05
201215_at	PLS3	1.36253	9.98373e-07
229444_at	LOC101929243	1.36249	1.91776e-08
204875_s_at	GMDS	1.36245	7.76605e-08
230329_s_at	NUDT6	1.36105	3.41303e-09
211756_at	PTHLH	1.3601	1.95389e-08
218921_at	SIGIRR	1.35995	0.000178779
205774_at	F12	1.3596	1.79932e-06
218885_s_at	GALNT12	1.35929	5.91956e-08
201648_at	JAK1	1.359	1.00677e-07
227019_at	C1orf226	1.35832	3.34253e-08
205257_s_at	AMPH	1.35809	2.97299e-05
226402_at	CYP2U1	1.35746	6.64884e-09
211535_s_at	FGFR1	1.35736	7.58384e-06
204604_at	CDK14	1.35483	4.07821e-06
219352_at	HERC6	1.35401	1.36766e-05
227846_at	GPR176	1.35388	8.25512e-09
207038_at	SLC16A6	1.35368	1.02392e-06
226805_at	FITM2	1.35179	9.1738e-09
210586_x_at	RHD	1.35003	2.04989e-07
209848_s_at	PMEL	1.34779	2.69465e-08
220736_at	SLC19A3	1.34762	1.72509e-08
235964_x_at	SAMHD1	1.34754	2.61617e-09
236282_at	LOC101927420	1.34741	2.63632e-06
228933_at	NHS	1.34731	5.70669e-06
1554256_a_at	PCNX2	1.34669	4.22729e-05
1569906_s_at	PHF20	1.34584	8.50928e-08
213040_s_at	NPTXR	1.34514	0.00285921
221599_at	AAMDC	1.34485	1.42318e-09
209765_at	ADAM19	1.34484	1.32133e-07
235837_at	SNIP1	1.34413	2.02431e-08
209190_s_at	DIAPH1	1.34324	5.96534e-08
219238_at	PIGV	1.34154	2.49032e-08
1557765_at	PURPL	1.33877	0.0125649
216804_s_at	PDLIM5	1.33868	4.66883e-07
210026_s_at	CARD10	1.33767	1.97156e-05
225451_at	GRIPAP1	1.33727	3.40415e-08
1552476_s_at	PLCD3	1.33713	9.31357e-07
238600_at	JAKMIP1	1.33697	3.085e-06
35254_at	TRAFD1	1.3366	7.21131e-07
227280_s_at	CCNYL1	1.33554	8.10237e-09
226615_at	XPR1	1.33534	2.97971e-09
225651_at	UBE2E2	1.33531	4.18186e-10
226140_s_at	OTUD1	1.33519	2.68067e-08
219079_at	CYB5R4	1.33471	2.92147e-07
36553_at	ASMTL	1.33194	3.01349e-09
226531_at	ORAI1	1.33179	2.10358e-08
212667_at	SPARC	1.3313	5.86868e-06
208613_s_at	FLNB	1.32996	4.5495e-06
205164_at	GCAT	1.32959	4.41284e-07
1552289_a_at	CILP2	1.32918	1.68831e-07
1556261_a_at	LINC01771	1.3289	1.30259e-06
213802_at	PRSS12	1.3254	1.81454e-05
1556488_s_at	MAATS1	1.32511	1.65728e-06
226955_at	AFAP1L1	1.32487	7.25232e-05
212336_at	EPB41L1	1.3247	6.99962e-07
232352_at	ISL2	1.32458	2.9044e-06
222797_at	DPYSL5	1.32454	1.66197e-07
203917_at	CXADR	1.32345	2.99868e-09
235182_at	ISM1	1.32266	7.24173e-05
1554486_a_at	GFOD1	1.32262	3.78343e-05
213234_at	FAM234B	1.32246	2.39893e-07
205888_s_at	JAKMIP2	1.32208	4.66913e-05
223682_s_at	EIF1AD	1.32186	4.16468e-09
217478_s_at	HLA-DMA	1.32073	1.00409e-06
239302_s_at	LOC100506922	1.32061	1.33836e-05
1562245_a_at	ZNF578	1.31948	0.00170587
204311_at	ATP1B2	1.31815	2.81002e-06
1559633_a_at	CHRM3	1.31801	4.9251e-05
203510_at	MET	1.31727	4.72732e-08
236513_at	PRELID2	1.31699	2.14461e-08
235238_at	SHC4	1.31628	6.07499e-05
238451_at	MPP7	1.31552	2.77786e-08
217436_x_at	HLA-J	1.3148	2.00174e-08
205196_s_at	AP1S1	1.31478	1.35593e-07
239108_at	FAR2	1.31474	2.28572e-05
221790_s_at	LDLRAP1	1.31314	3.96728e-06
204466_s_at	SNCA	1.31264	1.73536e-09
204784_s_at	MLF1	1.31252	5.85826e-09
222173_s_at	TBC1D2	1.31149	4.35809e-05
208704_x_at	APLP2	1.31137	2.29843e-09
207178_s_at	FRK	1.31107	1.32893e-05
204328_at	TMC6	1.31024	4.1608e-05
218699_at	RAB29	1.30981	1.33144e-08
219268_at	ETNK2	1.30703	4.24602e-06
219397_at	COQ10B	1.30619	7.61963e-08
201251_at	PKM	1.30571	3.2024e-09
225205_at	KIF3B	1.30472	5.20271e-08
205437_at	ZNF211	1.30417	7.74785e-06
219764_at	FZD10	1.30368	0.000547302
227325_at	INAFM1	1.30346	1.05642e-06
201289_at	CYR61	1.30284	1.07012e-05
226930_at	FNDC1	1.30282	9.18117e-06
203501_at	CPQ	1.30123	2.06135e-07
219196_at	SCG3	1.30088	5.37691e-06
226390_at	STARD4	1.29911	3.31269e-07
217893_s_at	AKIRIN1	1.29908	9.83698e-09
239246_at	FARP1	1.29877	1.41496e-05
208427_s_at	ELAVL2	1.29873	6.44674e-06
241871_at	CAMK4	1.29749	7.63877e-07
218696_at	EIF2AK3	1.29739	4.50509e-08
212990_at	SYNJ1	1.29733	1.8931e-06
202501_at	MAPRE2	1.29589	6.41704e-06
202009_at	TWF2	1.29488	4.7386e-08
217678_at	SLC7A11	1.29437	3.37054e-05
235362_at	LOC729970	1.29328	2.58769e-06
209236_at	SLC23A2	1.2932	7.86048e-09
204434_at	SPATA2	1.29305	4.36508e-08
203706_s_at	FZD7	1.29249	1.35935e-08
224650_at	MAL2	1.28862	3.69222e-05
227614_at	HKDC1	1.28404	0.000864067
221217_s_at	RBFOX1	1.2837	2.60065e-05
226498_at	FLT1	1.28101	0.000498487
218217_at	SCPEP1	1.2794	8.6615e-08
202211_at	ARFGAP3	1.27871	5.80089e-08
219412_at	RAB38	1.27864	2.76631e-06
223195_s_at	SESN2	1.27846	4.62356e-06
205027_s_at	MAP3K8	1.27834	0.000140433
227008_at	HDDC3	1.27714	6.58582e-08
204034_at	ETHE1	1.2771	1.8738e-08
218191_s_at	LMBRD1	1.2765	2.49032e-08
232994_s_at	ARHGEF28	1.27569	4.58041e-07
219300_s_at	CNTNAP2	1.27542	2.02826e-07
61734_at	RCN3	1.27467	3.71223e-06
1558953_s_at	CEP164	1.2744	8.19836e-08
203695_s_at	GSDME	1.27348	3.20587e-06
203725_at	GADD45A	1.27182	6.71483e-09
217794_at	PRR13	1.27035	1.09726e-08
203849_s_at	KIF1A	1.26965	4.08949e-08
204633_s_at	RPS6KA5	1.26928	5.87038e-05
1555579_s_at	PTPRM	1.269	3.05425e-05
225522_at	AAK1	1.26823	3.04535e-07
232080_at	HECW2	1.26749	5.14816e-06
202013_s_at	EXT2	1.26549	6.75683e-08
204141_at	TUBB2A	1.26318	5.52197e-07
230560_at	STXBP6	1.26197	4.96747e-06
222890_at	CCDC113	1.26022	3.17869e-06
206217_at	EDA	1.26013	1.36728e-08
209163_at	CYB561	1.26004	2.10963e-07
209598_at	PNMA2	1.2591	6.23046e-08
1557455_s_at	MOSPD1	1.258	4.88049e-08
226925_at	PXYLP1	1.25764	2.03465e-08
205198_s_at	ATP7A	1.25745	4.28857e-05
205768_s_at	SLC27A2	1.25725	1.53166e-08
201764_at	TMEM106C	1.25588	3.40415e-08
221031_s_at	APOLD1	1.25537	1.33235e-05
201313_at	ENO2	1.25502	8.11405e-10
227641_at	FBXL16	1.25357	1.29262e-05
212239_at	PIK3R1	1.25305	3.28896e-08
202732_at	PKIG	1.253	1.72309e-07
215489_x_at	HOMER3	1.24978	1.36733e-07
215313_x_at	HLA-A	1.24926	4.89952e-09
212688_at	PIK3CB	1.24906	3.85759e-08
205003_at	DOCK4	1.2482	7.65921e-08
226098_at	IFT80	1.24741	1.6417e-08
212992_at	AHNAK2	1.24431	0.00134889
223580_at	SPSB2	1.24381	5.36225e-08
225843_at	ZFYVE19	1.24317	3.89687e-06
208055_s_at	HERC4	1.23984	1.71658e-07
218964_at	ARID3B	1.23922	1.99611e-07
203459_s_at	VPS16	1.23917	2.55752e-07
203910_at	ARHGAP29	1.2389	0.000121344
220595_at	PDZRN4	1.23728	0.000244763
228548_at	RAP1A	1.23573	9.76109e-07
205676_at	CYP27B1	1.2354	0.000383895
229513_at	STRBP	1.23392	9.72079e-08
206756_at	CHST7	1.23193	3.68506e-06
208894_at	HLA-DRA	1.23186	1.90569e-05
238455_at	PLXDC2	1.23182	3.88779e-06
204936_at	MAP4K2	1.2294	2.33445e-05
203657_s_at	CTSF	1.22845	1.77431e-07
1558689_a_at	STX17-AS1	1.22801	2.27999e-05
232523_at	MEGF10	1.22792	0.0122737
217783_s_at	YPEL5	1.2275	9.83695e-09
218856_at	TNFRSF21	1.22617	5.36013e-08
204337_at	RGS4	1.2258	9.58473e-06
212226_s_at	PLPP3	1.22521	4.10248e-06
214369_s_at	RASGRP2	1.22478	3.20113e-05
227868_at	LOC154761	1.22449	6.76645e-06
225673_at	MYADM	1.22293	7.65415e-07
237254_at	SLC5A11	1.22235	3.72687e-05
225234_at	CBL	1.22199	2.83414e-08
227394_at	NCAM1	1.22121	1.52773e-07
201811_x_at	SH3BP5	1.2205	4.39698e-09
238893_at	ATP2B1-AS1	1.22034	0.000284131
227951_s_at	FAM98C	1.21834	1.03074e-08
206091_at	MATN3	1.21826	0.000625523
203845_at	KAT2B	1.2174	3.69902e-05
208146_s_at	CPVL	1.21679	6.62367e-08
1558577_at	LOC148709	1.21541	1.20943e-05
210544_s_at	ALDH3A2	1.21483	1.05688e-07
223250_at	KLHL7	1.2135	7.33185e-07
222248_s_at	SIRT4	1.21247	1.01071e-06
223457_at	COPG2	1.21246	2.2026e-06
244885_at	EBF2	1.21149	0.000630686
229605_at	CYB5RL	1.21028	4.86297e-07
39248_at	AQP3	1.20956	3.62117e-06
213435_at	SATB2	1.20841	6.13997e-07
226509_at	ZNF641	1.20828	1.38564e-05
221268_s_at	SGPP1	1.20619	2.32514e-08
205747_at	CBLN1	1.20611	0.00117895
219551_at	EAF2	1.20531	3.14919e-05
220072_at	CSPP1	1.20307	1.84445e-07
226454_at	MARCH9	1.20222	4.75961e-06
218608_at	ATP13A2	1.20186	2.05104e-07
235818_at	VSTM1	1.20151	0.000769789
213825_at	OLIG2	1.20097	7.92939e-05
203151_at	MAP1A	1.20088	0.000346845
222969_at	B3GALT1	1.19987	3.93794e-07
229875_at	ZDHHC22	1.19947	0.000282174
221667_s_at	HSPB8	1.19656	0.00267166
229779_at	COL4A4	1.19522	1.98723e-05
229276_at	IGSF9	1.19347	8.27988e-05
242176_at	MEF2A	1.19328	7.80947e-08
237810_at	CLDN6	1.19314	1.43206e-05
204656_at	SHB	1.19281	7.97092e-08
226671_at	LAMP2	1.19222	5.58576e-09
217939_s_at	AFTPH	1.19188	1.3265e-08
221914_at	SYN1	1.18983	1.76376e-05
202465_at	PCOLCE	1.1886	3.03673e-06
202641_at	ARL3	1.18838	1.36666e-09
1557176_a_at	ARMH4	1.18603	1.62115e-06
220397_at	MDM1	1.18471	2.44765e-05
218124_at	RETSAT	1.183	1.96678e-08
201536_at	DUSP3	1.18014	1.76883e-09
204199_at	RALGPS1	1.17988	0.000916106
226817_at	DSC2	1.17841	2.92273e-06
218556_at	ORMDL2	1.1784	3.60962e-08
203454_s_at	ATOX1	1.1784	3.5255e-07
212942_s_at	CEMIP	1.17789	0.00429821
202587_s_at	AK1	1.17711	1.24816e-07
213946_s_at	OBSL1	1.17695	1.63096e-06
225913_at	PEAK1	1.17665	1.26809e-05
220289_s_at	CRYBG2	1.17559	1.82096e-06
203515_s_at	PMVK	1.17524	1.92689e-09
229399_at	CCDC186	1.175	5.43077e-05
218032_at	SNN	1.17494	4.26811e-07
203892_at	WFDC2	1.17452	0.000435781
1553489_a_at	TEKT5	1.17397	1.49308e-08
202263_at	CYB5R1	1.17285	3.73517e-06
203516_at	SNTA1	1.17281	6.45706e-06
204810_s_at	CKM	1.1727	0.000708346
235626_at	CAMK1D	1.17147	5.10744e-06
1553226_at	LINC00052	1.17113	8.38361e-05
216039_at	GABRA2	1.17106	5.50162e-07
204015_s_at	DUSP4	1.16929	2.4805e-05
200866_s_at	PSAP	1.16928	2.13807e-09
218706_s_at	GRAMD2B	1.16847	4.49472e-06
212622_at	TMEM41B	1.16797	1.57372e-08
204622_x_at	NR4A2	1.16792	2.36302e-05
227013_at	LATS2	1.16686	6.2812e-05
235030_at	NXPE3	1.16506	1.11565e-06
219277_s_at	OGDHL	1.16314	0.000181681
218115_at	ASF1B	1.16279	3.98473e-05
224460_s_at	L2HGDH	1.16177	8.21641e-09
213312_at	SMIM8	1.16101	1.215e-07
222587_s_at	GALNT7	1.16065	1.43251e-06
227278_at	TAF13	1.16021	2.45154e-07
202664_at	WIPF1	1.16018	1.5922e-05
218162_at	OLFML3	1.15908	0.000608625
201889_at	FAM3C	1.15892	1.60673e-06
206608_s_at	RPGRIP1	1.15751	6.84377e-05
1555253_at	COL25A1	1.15731	0.000125208
225667_s_at	FAM84A	1.15722	1.82734e-05
219426_at	AGO3	1.15654	2.75726e-05
205498_at	GHR	1.15616	0.000446411
205652_s_at	TTLL1	1.15555	8.3836e-06
222682_s_at	FAM114A2	1.15477	3.35689e-07
206513_at	AIM2	1.15341	5.4233e-05
204394_at	SLC43A1	1.15295	1.318e-06
227430_at	ZC3H10	1.15288	4.43335e-06
223967_at	ANGPTL6	1.1514	7.33639e-07
230047_at	ARHGAP42	1.15132	0.000738498
219689_at	SEMA3G	1.1512	1.29196e-05
200621_at	CSRP1	1.15062	5.74163e-06
226105_at	C1GALT1	1.1505	7.05388e-08
218409_s_at	DNAJC1	1.14958	6.16975e-08
236193_at	HIST1H2BC	1.14914	0.0330258
227196_at	RHPN2	1.14848	3.9384e-07
225775_at	TSPAN33	1.14838	6.33327e-05
226216_at	INSR	1.1461	5.50751e-06
243951_at	ABCB1	1.14547	1.27411e-08
203927_at	NFKBIE	1.14491	3.95066e-07
205107_s_at	EFNA4	1.14432	0.000138793
203298_s_at	JARID2	1.14402	5.54396e-07
204047_s_at	PHACTR2	1.14385	6.69945e-06
242070_at	LOC728485	1.14356	2.52052e-06
210105_s_at	FYN	1.14251	4.97036e-08
203085_s_at	TGFB1	1.14214	1.05906e-05
216336_x_at	MT1E	1.14191	2.41e-08
204608_at	ASL	1.14163	1.50396e-05
218788_s_at	SMYD3	1.14151	5.85806e-09
225283_at	ARRDC4	1.141	1.13228e-06
236666_s_at	LRRC10B	1.14064	0.00116157
823_at	CX3CL1	1.13961	1.36635e-05
229372_at	GOLT1A	1.13936	7.3332e-05
219257_s_at	SPHK1	1.13653	4.43816e-06
208322_s_at	ST3GAL1	1.13617	1.97923e-06
218070_s_at	GMPPA	1.13492	3.42717e-06
209211_at	KLF5	1.13423	7.30362e-05
232079_s_at	NECTIN2	1.13414	3.85259e-06
218967_s_at	PTER	1.13384	4.96141e-08
225895_at	SYNPO2	1.13378	2.86848e-05
225189_s_at	RAPH1	1.13357	1.45556e-06
213413_at	STON1	1.13059	1.79059e-07
224447_s_at	MIEN1	1.13045	6.24966e-07
230104_s_at	TPPP	1.13012	0.000110966
1552755_at	C9orf66	1.1299	2.28754e-05
205441_at	OCEL1	1.12949	0.00026512
202772_at	HMGCL	1.12867	1.27236e-06
225625_at	ALKBH2	1.12794	6.85274e-09
227022_at	GNPDA2	1.12751	6.10764e-07
224707_at	CYSTM1	1.12703	3.58931e-08
201126_s_at	MGAT1	1.12652	1.15887e-06
230351_at	FGF14-AS2	1.1263	2.26107e-06
212993_at	NACC2	1.12555	0.000169233
1553654_at	SYT14	1.12453	1.03395e-06
221764_at	R3HDM4	1.1242	1.0359e-07
201661_s_at	ACSL3	1.12413	4.82529e-08
221898_at	PDPN	1.12291	6.05845e-07
217925_s_at	C6orf106	1.12172	4.88565e-08
203951_at	CNN1	1.12133	2.81023e-06
209441_at	RHOBTB2	1.12131	1.032e-07
225282_at	SMAP2	1.12083	1.51183e-07
230611_at	SYPL2	1.11933	1.10627e-05
226378_s_at	C19orf25	1.11871	3.99705e-07
226027_at	SWI5	1.11855	1.57763e-07
242313_at	LOC728730	1.11851	1.46695e-05
205799_s_at	SLC3A1	1.11844	2.97764e-07
204518_s_at	PPIC	1.11799	4.12968e-06
213113_s_at	SLC43A3	1.11754	1.06298e-05
201847_at	LIPA	1.11733	9.31019e-09
219225_at	PGBD5	1.11606	6.22837e-05
206493_at	ITGA2B	1.11579	8.47234e-06
220251_at	DIEXF	1.11469	1.26136e-05
204944_at	PTPRG	1.11437	0.000198193
243027_at	IGSF5	1.11344	4.16053e-06
200606_at	DSP	1.11217	1.38958e-06
226269_at	GDAP1	1.11125	2.03907e-07
241456_at	FAM78B	1.10794	0.00012156
230285_at	SVIP	1.10767	2.77577e-08
1554481_a_at	EPB41	1.10659	8.95965e-08
211538_s_at	HSPA2	1.10622	0.00161774
203987_at	FZD6	1.10593	3.59047e-06
230624_at	SLC25A27	1.10537	6.47395e-06
1564359_a_at	CCDC144NL-AS1	1.10443	4.17303e-07
243835_at	ZDHHC21	1.1044	3.92438e-07
227252_at	LRP10	1.10347	1.04152e-06
205190_at	PLS1	1.10318	2.52786e-08
234995_at	SPICE1	1.10263	0.000106215
201900_s_at	AKR1A1	1.1022	9.26147e-09
204714_s_at	F5	1.10128	1.14056e-05
238453_at	FGFBP3	1.10097	0.000962039
208018_s_at	HCK	1.09993	0.000158855
238824_at	RPS29	1.09977	9.68085e-05
227562_at	LAMTOR3	1.09947	1.90043e-06
228783_at	BVES	1.09857	0.000604754
1552712_a_at	NMNAT2	1.09589	9.55849e-06
1558308_at	LINC00942	1.09577	0.000875033
219325_s_at	ELAC1	1.09553	2.8164e-06
235061_at	PPM1K	1.09459	2.17875e-05
227135_at	NAAA	1.0945	9.20348e-05
219745_at	MFSD13A	1.09445	3.98266e-05
228254_at	STAM2	1.09319	5.22275e-07
209339_at	SIAH2	1.09306	9.90293e-05
205357_s_at	AGTR1	1.09273	2.83983e-06
223335_at	TMEM69	1.09224	2.2516e-07
205111_s_at	PLCE1	1.09199	1.76892e-05
202826_at	SPINT1	1.08929	1.22378e-05
230896_at	BEND4	1.08906	7.01114e-09
209462_at	APLP1	1.0884	2.32247e-06
209346_s_at	PI4K2A	1.08776	5.65084e-06
225146_at	FAM219A	1.08744	2.14147e-06
1554547_at	FAM13C	1.08675	6.56898e-06
203656_at	FIG4	1.08669	1.65996e-05
228792_at	MYEF2	1.0859	1.00922e-06
224728_at	ATPAF1	1.0854	5.371e-06
207233_s_at	MITF	1.08531	4.96141e-08
203720_s_at	ERCC1	1.08478	2.11559e-07
231944_at	ERO1B	1.08387	7.93675e-06
203961_at	NEBL	1.0832	6.97417e-05
238673_at	SAMD12	1.08299	0.000883644
213392_at	IQCK	1.08254	4.35591e-09
215259_s_at	CADM4	1.08046	7.44444e-07
200827_at	PLOD1	1.07953	4.9987e-06
201208_s_at	TNFAIP1	1.0779	1.39497e-07
239092_at	ITGA8	1.07763	1.98687e-05
213069_at	HEG1	1.07726	2.53348e-05
212914_at	CBX7	1.07716	5.54496e-06
228635_at	PCDH10	1.07681	1.94213e-06
201688_s_at	TPD52	1.07548	2.25338e-07
209679_s_at	SMAGP	1.07444	2.47854e-07
220372_at	DNAJC28	1.07307	1.48092e-05
209227_at	TUSC3	1.07191	1.88641e-07
219435_at	CTC1	1.07165	6.73958e-05
226573_at	DIRAS1	1.07158	1.799e-06
215903_s_at	MAST2	1.07152	2.58588e-06
1555255_a_at	PPIP5K1	1.07062	6.3638e-07
225998_at	GAB1	1.07023	2.12139e-08
201776_s_at	EFCAB14	1.06967	5.12303e-06
209691_s_at	DOK4	1.06582	0.000174344
219694_at	OTULINL	1.06508	2.68765e-05
219154_at	TMEM120B	1.06485	4.87546e-07
206625_at	PRPH2	1.06456	7.90957e-06
227755_at	ERN1	1.06243	3.74188e-07
221895_at	MOSPD2	1.06218	2.39013e-07
222689_at	ACER3	1.06058	4.68431e-07
232500_at	RALGAPA2	1.05944	9.5973e-06
217286_s_at	NDRG3	1.05813	3.47194e-08
244661_at	SOAT1	1.05809	1.20904e-08
229596_at	AMDHD1	1.05737	2.60207e-05
203136_at	RABAC1	1.05698	2.03425e-07
50221_at	TFEB	1.05658	2.9532e-06
213119_at	SLC36A1	1.05611	2.16663e-06
209061_at	NCOA3	1.05603	8.20143e-08
224981_at	TMEM219	1.05521	1.4964e-07
225846_at	ESRP1	1.05511	3.52699e-06
235409_at	MGA	1.05483	7.17238e-06
212458_at	SPRED2	1.05479	0.00018297
224352_s_at	CFL2	1.05463	1.80274e-07
205331_s_at	REEP2	1.05314	9.51394e-05
218065_s_at	TMEM9B	1.0523	5.94993e-09
203851_at	IGFBP6	1.04982	9.30186e-07
226470_at	GGT7	1.04967	1.90509e-05
228228_at	DACT3	1.04941	8.18629e-06
218935_at	EHD3	1.04891	6.93924e-08
238983_at	NSUN7	1.04801	0.000165985
205104_at	SNPH	1.04573	7.4612e-06
205083_at	AOX1	1.045	3.75919e-05
206805_at	SEMA3A	1.04486	5.21659e-05
203455_s_at	SAT1	1.04481	6.19785e-06
232596_at	DIAPH3	1.04374	1.89488e-06
1569699_at	AK7	1.04303	7.16295e-07
205298_s_at	BTN2A2	1.04297	9.42763e-08
227261_at	KLF12	1.04133	1.01218e-06
1557341_x_at	PIK3CD-AS2	1.04114	2.52422e-05
226961_at	PRR15	1.04015	3.19293e-05
225615_at	IFFO2	1.03693	2.97898e-05
209693_at	ASTN2	1.03686	3.59871e-08
242761_s_at	ZNF420	1.03579	1.64467e-08
211071_s_at	MLLT11	1.0357	2.44975e-06
238728_at	MRPS23	1.03501	7.1954e-08
221868_at	PAIP2B	1.03488	0.000143477
233177_s_at	PNKD	1.03481	1.5717e-05
201266_at	TXNRD1	1.03463	1.06099e-08
212221_x_at	IDS	1.03323	3.37383e-07
228195_at	C2orf88	1.03305	3.24942e-06
213549_at	PDZD8	1.0319	1.45247e-08
225354_s_at	SH3BGRL2	1.031	5.38589e-07
225997_at	MOB1B	1.03074	1.10328e-07
213938_at	ERC2	1.02973	3.70959e-05
211347_at	CDC14B	1.02961	4.42302e-05
225728_at	SORBS2	1.02945	0.000709833
226561_at	AGFG1	1.02876	5.19806e-07
205406_s_at	SPA17	1.02876	1.23669e-05
1558666_at	PHEX-AS1	1.02858	0.000508108
226657_at	NATD1	1.0281	1.29786e-05
240236_at	STXBP5L	1.02733	4.60895e-05
235126_at	FLVCR1-DT	1.02721	2.61276e-05
241310_at	NEK5	1.0258	0.00038788
204154_at	CDO1	1.02561	7.34634e-06
230294_at	RALY-AS1	1.02513	1.45333e-05
207624_s_at	RPGR	1.02494	0.000748623
213896_x_at	FAM149B1	1.02484	1.38985e-06
229849_at	WIPF3	1.02476	3.34873e-06
1556128_a_at	RASGRF2	1.02453	0.000739193
217539_at	C18orf25	1.02438	1.9681e-05
223424_s_at	ZSCAN21	1.02424	1.45556e-06
222603_at	ERMP1	1.02403	2.75431e-07
220197_at	ATP6V0A4	1.02324	7.21718e-06
219894_at	MAGEL2	1.02322	6.78871e-06
212573_at	ENDOD1	1.0231	0.000400969
206631_at	PTGER2	1.02124	5.99953e-06
203718_at	PNPLA6	1.01989	1.55162e-07
232155_at	RNF213	1.01974	1.98821e-06
239169_at	RDM1	1.01911	1.43553e-05
221778_at	KDM7A	1.01824	8.79566e-07
40829_at	WDTC1	1.0182	6.48649e-07
218450_at	HEBP1	1.01808	2.34661e-07
204729_s_at	STX1A	1.01772	1.74908e-05
223596_at	SLC12A6	1.01768	9.25357e-06
215598_at	TTC12	1.0165	0.000459236
231233_at	PCAT6	1.01645	0.000346139
219770_at	GTDC1	1.01617	9.53626e-07
222996_s_at	CXXC5	1.01569	1.34167e-05
227766_at	LIG4	1.0147	3.0428e-06
208978_at	CRIP2	1.01442	3.08468e-05
210132_at	EFNA3	1.01419	0.000418072
227396_at	PTPRJ	1.01358	1.38382e-08
1553940_a_at	LRRC28	1.01352	0.000235338
225343_at	TMED8	1.01228	1.16059e-08
228566_at	RPRD1A	1.01149	0.000885836
229245_at	PLEKHA6	1.0102	2.96007e-06
202071_at	SDC4	1.01013	4.09816e-07
243868_at	RFX3	1.01008	3.12698e-06
205893_at	NLGN1	1.00897	8.42751e-05
219867_at	CHODL	1.00853	8.67643e-06
204137_at	GPR137B	1.00844	3.09261e-07
205932_s_at	MSX1	1.00684	1.25649e-05
218703_at	SEC22A	1.00528	4.18395e-05
203843_at	RPS6KA3	1.00519	1.85494e-07
228110_x_at	RABGEF1	1.00407	1.16214e-05
213654_at	TAF5L	1.00328	2.00555e-05
222854_s_at	GEMIN8	1.00263	3.58717e-05
224279_s_at	CABYR	1.00242	6.56598e-07
203182_s_at	SRPK2	1.00235	3.2024e-09
203561_at	FCGR2A	1.00145	0.00014995
226353_at	SPPL2A	0.999917	1.28334e-07
213181_s_at	MOCS1	0.999799	1.91859e-06
203919_at	TCEA2	0.999514	0.000246041
1564166_s_at	LOC100630923	0.999131	0.00406056
236344_at	PDE1C	0.998836	3.72025e-05
230100_x_at	PAK1	0.998045	3.44977e-07
225095_at	SPTLC2	0.997434	1.00918e-06
223395_at	ABI3BP	0.997201	8.80548e-05
229797_at	MCOLN3	0.995476	6.06028e-05
232203_at	NKD1	0.995382	8.47188e-07
203474_at	IQGAP2	0.995325	1.83776e-06
205818_at	BRINP1	0.994371	1.08185e-05
223748_at	SLC4A11	0.994276	8.63101e-05
218918_at	MAN1C1	0.993822	0.000100525
91703_at	EHBP1L1	0.993521	1.21965e-07
235566_at	TMF1	0.992645	0.000435745
205073_at	CYP2J2	0.992275	2.11808e-06
209604_s_at	GATA3	0.991974	2.15491e-05
227823_at	RTL5	0.991926	5.85715e-07
205418_at	FES	0.991853	2.78759e-07
211057_at	ROR1	0.99172	1.297e-06
236632_at	HHIP-AS1	0.98979	1.95979e-05
209031_at	CADM1	0.989527	5.82195e-07
224927_at	PPP1R18	0.989001	5.90448e-06
202838_at	FUCA1	0.988657	0.000929179
224916_at	TMEM173	0.98844	8.27404e-06
229338_at	LOC100289361	0.988333	6.10388e-05
227750_at	KALRN	0.987827	6.56644e-06
209307_at	SWAP70	0.985526	1.05688e-07
227471_at	HACE1	0.983689	3.67398e-06
229817_at	ZNF608	0.983006	2.3875e-05
225246_at	STIM2	0.982859	2.28202e-07
229025_s_at	IMMP1L	0.982153	3.26619e-08
202464_s_at	PFKFB3	0.980022	5.38589e-07
203574_at	NFIL3	0.979844	0.000125208
218611_at	IER5	0.97984	1.19829e-06
226326_at	PCGF5	0.979118	4.979e-06
227609_at	EPSTI1	0.978585	1.2658e-05
218950_at	ARAP3	0.978549	0.000114568
230361_at	MROH1	0.978091	0.000142076
218417_s_at	SLC48A1	0.977718	1.30324e-05
225232_at	MTMR12	0.977617	6.54294e-08
229516_at	WDR31	0.976089	5.00897e-05
220668_s_at	DNMT3B	0.974894	4.64904e-05
212335_at	GNS	0.974876	8.1844e-06
238440_at	CLYBL	0.974816	0.000316455
204264_at	CPT2	0.973597	9.24538e-08
221160_s_at	CABP5	0.97334	1.11667e-05
223710_at	CCL26	0.971465	3.35793e-05
226234_at	GDF11	0.971377	4.95487e-06
214853_s_at	SHC1	0.971317	3.17786e-08
203615_x_at	SULT1A1	0.971244	2.86308e-06
207136_at	ARR3	0.970767	0.0010193
244647_at	WBP11	0.97027	2.13105e-07
206085_s_at	CTH	0.969306	1.04254e-05
209799_at	PRKAA1	0.9693	4.21575e-06
218376_s_at	MICAL1	0.968703	2.39961e-05
228658_at	MIAT	0.968656	0.000382191
219596_at	THAP10	0.967683	4.45228e-06
202593_s_at	GDE1	0.967396	2.15155e-07
1729_at	TRADD	0.96647	1.0302e-07
207469_s_at	PIR	0.96598	0.000421265
223461_at	TBC1D7	0.965754	1.03913e-06
227970_at	GPR157	0.96569	2.38191e-05
212150_at	EFR3A	0.965568	2.20853e-08
202962_at	KIF13B	0.965479	5.8153e-06
203238_s_at	NOTCH3	0.965229	0.000578587
219591_at	CEND1	0.964849	5.84656e-06
205857_at	SLC18A2	0.964514	3.95658e-06
227775_at	CELF6	0.964514	7.54158e-07
206382_s_at	BDNF	0.962852	2.97299e-05
234312_s_at	ACSS2	0.962382	2.27897e-05
226875_at	DOCK11	0.962291	0.000117922
226086_at	SYT13	0.96202	0.0003993
201749_at	ECE1	0.961625	1.035e-05
200862_at	DHCR24	0.961385	4.36735e-08
1555074_a_at	KCNH5	0.961286	0.000257824
229872_s_at	LOC100996740	0.961257	1.84466e-05
223085_at	RNF19A	0.960307	7.32852e-07
1554393_a_at	AZIN2	0.960145	4.46634e-05
205691_at	SYNGR3	0.960115	0.00183267
222122_s_at	THOC2	0.959473	2.56922e-07
221909_at	RNFT2	0.959004	0.000224663
231396_s_at	FAM126A	0.958673	7.2678e-06
1553813_s_at	TLE6	0.957795	2.94839e-06
209882_at	RIT1	0.957792	2.22809e-06
223316_at	CCDC3	0.957617	9.52082e-07
219649_at	ALG6	0.957412	7.27624e-05
227180_at	ELOVL7	0.9563	0.000242765
1555561_a_at	UGGT2	0.9561	3.24992e-06
231202_at	ALDH1L2	0.955931	0.000438553
212383_at	ATP6V0A1	0.955662	3.27114e-06
225173_at	ARHGAP18	0.954951	3.89497e-06
229826_at	SMIM4	0.954633	0.00186305
212803_at	NAB2	0.954576	1.34172e-05
203192_at	ABCB6	0.954544	2.44846e-06
203198_at	CDK9	0.954151	4.15454e-07
227296_at	MFSD3	0.953667	1.71564e-07
236236_at	WNK3	0.951456	0.000118054
205248_at	DOPEY2	0.95033	7.12356e-06
230407_at	SBNO1	0.949494	9.98748e-07
218720_x_at	SEZ6L2	0.947339	7.08098e-05
226596_x_at	UMAD1	0.947179	1.62454e-05
235798_at	TMEM170B	0.94668	1.66819e-05
56256_at	SIDT2	0.945699	2.76759e-06
215717_s_at	FBN2	0.945153	6.45555e-05
225224_at	NOL4L	0.94456	4.40464e-05
223168_at	RHOU	0.944359	6.07256e-08
1861_at	BAD	0.943688	5.02237e-07
204872_at	TLE4	0.943285	6.94859e-07
204012_s_at	LCMT2	0.942535	7.65921e-08
205037_at	IFT27	0.942185	0.000138781
204516_at	ATXN7	0.941848	3.16832e-06
211086_x_at	NEK1	0.940412	0.00248296
228434_at	BTNL9	0.940183	4.33303e-05
213100_at	UNC5B	0.939998	4.97943e-07
227853_at	PLBD2	0.93969	2.75396e-05
209625_at	PIGH	0.939607	9.44938e-07
1554962_a_at	FGFR4	0.938651	8.01989e-06
1555892_s_at	CUTALP	0.938274	7.14324e-05
239457_at	ATP8B3	0.938006	0.00157733
226021_at	RDH10	0.937952	1.3443e-06
224947_at	RNF26	0.93738	2.54195e-05
229603_at	BBS12	0.937254	0.000109605
33494_at	ETFDH	0.936464	4.85715e-07
226145_s_at	FRAS1	0.936146	6.86475e-05
204362_at	SKAP2	0.936005	0.000131409
203911_at	RAP1GAP	0.935812	4.39942e-05
232164_s_at	EPPK1	0.935466	0.00995046
223626_x_at	IFI27L2	0.935241	2.38595e-06
204009_s_at	KRAS	0.934742	9.70466e-08
237411_at	ADAMTS6	0.934729	2.85986e-05
1562389_at	LOC101927359	0.934709	0.000581647
203108_at	GPRC5A	0.934416	1.14913e-05
202125_s_at	TRAK2	0.934112	8.4399e-07
236990_at	LOC101928403	0.933153	0.00743798
1552685_a_at	GRHL1	0.93299	7.56399e-06
214595_at	KCNG1	0.932284	0.00057385
216470_x_at	PRSS2	0.93215	2.61328e-06
206209_s_at	CA4	0.931857	2.0605e-06
208072_s_at	DGKD	0.931727	4.2159e-07
209522_s_at	CRAT	0.930842	9.7339e-06
210233_at	IL1RAP	0.929826	0.00161722
228454_at	LCOR	0.928213	9.4841e-08
206076_at	LRRC23	0.927897	2.86826e-07
238966_at	CELF4	0.927642	2.0674e-05
223060_at	C14orf119	0.927305	4.90917e-08
202898_at	SDC3	0.927199	2.98359e-05
228176_at	S1PR3	0.92681	0.000424402
206385_s_at	ANK3	0.926751	8.0206e-08
223171_at	DYM	0.926719	1.31645e-07
201641_at	BST2	0.926563	7.34584e-06
230165_at	SGO2	0.926193	4.41536e-07
208916_at	SLC1A5	0.925243	2.14147e-06
220195_at	MBD5	0.924919	8.98893e-06
244439_at	SPRED1	0.924793	2.52005e-05
205534_at	PCDH7	0.924381	0.000151281
223279_s_at	UACA	0.92325	6.83363e-05
1555315_a_at	MAK	0.922281	8.56861e-06
238495_at	LRRC57	0.922103	1.55243e-06
205542_at	STEAP1	0.921654	1.30188e-07
217766_s_at	TMEM50A	0.921405	5.5135e-08
235278_at	MACROD2	0.920884	9.64142e-05
1552274_at	PXK	0.920631	1.46488e-05
225718_at	LNPK	0.920294	3.16918e-07
201034_at	ADD3	0.920269	3.09436e-07
218749_s_at	SLC8B1	0.920255	1.04492e-06
221912_s_at	CCDC28B	0.919931	1.42324e-05
214965_at	SPATA2L	0.919681	6.16488e-06
204979_s_at	SH3BGR	0.919561	3.61377e-05
226423_at	PAQR8	0.919163	8.73708e-05
240537_s_at	CDIPTOSP	0.919159	1.46195e-06
225147_at	CYTH3	0.917671	2.793e-05
203320_at	SH2B3	0.917463	7.83335e-05
221843_s_at	TLDC1	0.917431	6.02187e-07
209389_x_at	DBI	0.917193	8.41392e-08
1552665_at	JMJD1C-AS1	0.917176	0.00173147
218418_s_at	KANK2	0.917111	3.12283e-06
221258_s_at	KIF18A	0.916945	0.000444683
1564031_a_at	RELL2	0.916642	2.43611e-05
203232_s_at	ATXN1	0.916343	1.44555e-05
226576_at	ARHGAP26	0.915464	0.000332682
225772_s_at	COX14	0.915404	2.84857e-08
223475_at	CRISPLD1	0.914813	0.000162405
226742_at	SAR1B	0.914657	6.29126e-07
241359_at	TLCD2	0.914301	9.37646e-05
225557_at	CSRNP1	0.913926	1.65413e-05
212098_at	MGAT5	0.911703	2.74433e-06
214913_at	ADAMTS3	0.911281	2.09891e-06
223176_at	KCTD20	0.910236	1.10278e-07
204437_s_at	FOLR1	0.909742	0.000154723
224645_at	EIF4EBP2	0.909515	2.38722e-08
229460_at	FAM126B	0.909504	1.56423e-06
225619_at	SLAIN1	0.909249	2.40485e-05
210203_at	CNOT4	0.908533	0.00152709
218627_at	DRAM1	0.908464	3.69784e-06
225776_at	RBMS2	0.906742	0.000110882
204480_s_at	C9orf16	0.906604	2.21681e-05
219005_at	TMEM59L	0.906359	0.000601683
243815_at	PGBD4	0.905696	0.00827076
32091_at	SLC25A44	0.905141	3.74684e-07
635_s_at	PPP2R5B	0.904709	8.64322e-06
223373_s_at	PLA2G12A	0.904334	1.01797e-07
228293_at	DEPDC7	0.904115	1.23348e-06
1554145_a_at	PPP1R21	0.904004	2.15083e-05
229818_at	SVOP	0.903408	1.94732e-06
208325_s_at	AKAP13	0.903396	1.11314e-05
225930_at	NKIRAS1	0.903053	7.54158e-07
213375_s_at	N4BP2L1	0.902806	0.00154433
230118_at	GEMIN6	0.902074	0.000163617
229198_at	USP35	0.901898	3.33498e-07
223234_at	MAD2L2	0.901346	5.97964e-07
221604_s_at	PEX16	0.901294	1.84845e-05
208546_x_at	HIST1H2BH	0.901046	0.000186179
223046_at	EGLN1	0.900836	1.14018e-06
230110_at	MCOLN2	0.900589	1.93914e-06
218909_at	RPS6KC1	0.900552	9.8695e-06
225509_at	SAP30L	0.900379	6.95683e-07
223361_at	ABRACL	0.899265	0.00049912
223473_at	MPV17L2	0.898987	7.5705e-06
221845_s_at	CLPB	0.897912	8.1844e-06
223576_at	C6orf203	0.897703	1.3485e-06
219513_s_at	SH2D3A	0.897677	8.18629e-06
236400_at	IDH1-AS1	0.897601	7.3909e-05
204086_at	PRAME	0.896035	1.97594e-07
222162_s_at	ADAMTS1	0.894411	3.69373e-05
227300_at	TMEM119	0.89437	4.2904e-06
234970_at	TC2N	0.893099	4.58799e-07
220387_s_at	HHLA3	0.893087	0.000242823
243036_at	CCDC30	0.893	3.24176e-06
211913_s_at	MERTK	0.892948	6.51666e-07
222871_at	KLHDC8A	0.892614	3.29956e-06
1563792_at	AMN	0.8926	0.000345819
210606_x_at	KLRD1	0.892451	0.000397261
219525_at	SLC47A1	0.892322	0.000578587
225182_at	TMEM50B	0.891745	1.42556e-07
212786_at	CLEC16A	0.89173	1.53135e-05
225108_at	AGPS	0.890869	1.67024e-06
1555419_a_at	ASAH1	0.890029	1.33515e-07
223450_s_at	COG3	0.890005	2.55519e-05
204720_s_at	DNAJC6	0.88967	3.61812e-06
224682_at	ANKIB1	0.889335	9.5987e-08
209204_at	LMO4	0.889308	4.32168e-05
219368_at	NAP1L2	0.889298	1.57064e-05
202546_at	VAMP8	0.888821	0.000206544
213603_s_at	RAC2	0.888578	0.00108557
210246_s_at	ABCC8	0.888337	8.06173e-05
203953_s_at	CLDN3	0.88769	0.000241873
205996_s_at	AK2	0.887631	1.05661e-06
38340_at	HIP1R	0.886605	8.18491e-06
213449_at	POP1	0.886531	6.50887e-05
220750_s_at	P3H1	0.88653	6.45701e-05
233748_x_at	PRKAG2	0.885863	5.4359e-07
207321_s_at	ABCB9	0.885621	0.000168674
219956_at	GALNT6	0.885429	1.43206e-05
211864_s_at	MYOF	0.885188	4.54695e-05
228771_at	GRK3	0.885124	1.20917e-05
202262_x_at	DDAH2	0.885077	7.60604e-06
38269_at	PRKD2	0.884781	4.3602e-06
219140_s_at	RBP4	0.88476	0.0158591
217977_at	MSRB1	0.884408	1.92872e-07
242522_at	TCF24	0.883786	0.00046254
201349_at	SLC9A3R1	0.882605	3.61475e-06
230597_at	SLC7A3	0.882521	0.000486562
230563_at	RASGEF1A	0.882438	0.000865776
1554440_at	KIAA0513	0.882176	7.5005e-05
205590_at	RASGRP1	0.881384	0.00617913
226977_at	IGIP	0.881234	3.41366e-06
204284_at	PPP1R3C	0.880737	0.00081935
235459_at	RNF41	0.880252	0.000933974
214014_at	CDC42EP2	0.8797	5.59585e-05
226111_s_at	ZNF385A	0.877933	1.78965e-07
204091_at	PDE6D	0.876163	2.73193e-06
212476_at	ACAP2	0.875862	1.00507e-06
218002_s_at	CXCL14	0.8756	0.000198665
220753_s_at	CRYL1	0.875591	8.62897e-05
238039_at	SCAMP1-AS1	0.875237	0.000552776
201287_s_at	SDC1	0.874226	7.23202e-07
1555916_at	RPUSD3	0.874133	1.94489e-06
218351_at	COMMD8	0.874039	1.17263e-07
202923_s_at	GCLC	0.873907	7.37276e-07
1559009_at	LOC101928504	0.873617	0.00118992
228457_at	PPM1L	0.872819	0.000157747
211075_s_at	CD47	0.872555	5.79129e-08
227070_at	GLT8D2	0.871667	0.00198784
224984_at	NFAT5	0.871455	4.04852e-05
225212_at	SLC25A25	0.870975	6.9839e-05
201439_at	GBF1	0.870761	2.35896e-05
200078_s_at	ATP6V0B	0.870587	9.24738e-08
208924_at	RNF11	0.870381	1.04323e-06
237365_at	ELOVL2-AS1	0.870115	0.000148762
204952_at	LYPD3	0.869426	8.97763e-05
204955_at	SRPX	0.868256	1.23204e-06
219577_s_at	ABCA7	0.86806	0.000203512
217732_s_at	ITM2B	0.86797	1.17594e-07
201554_x_at	GYG1	0.867749	1.2448e-05
212206_s_at	H2AFV	0.867003	2.41e-08
231146_at	FAM24B	0.866327	6.95722e-06
216268_s_at	JAG1	0.86602	6.51666e-07
215229_at	CERNA1	0.865526	6.21474e-05
212886_at	CCDC69	0.865369	4.3007e-05
227200_at	ETV3	0.86431	2.03078e-07
228081_at	CCNG2	0.863766	0.00434522
229385_s_at	TINCR	0.863674	6.76173e-05
232629_at	PROK2	0.863422	9.83371e-05
207035_at	SLC30A3	0.863029	6.02722e-06
235793_at	TPGS2	0.862719	1.1213e-06
239050_s_at	CRIPT	0.861586	1.04137e-06
201403_s_at	MGST3	0.861347	3.05413e-07
219147_s_at	NMRK1	0.861242	1.01817e-07
1553960_at	SNX21	0.861018	5.01118e-06
210145_at	PLA2G4A	0.860862	9.14906e-08
200961_at	SEPHS2	0.860809	9.63705e-08
216938_x_at	DRD2	0.860744	8.85962e-07
203605_at	SRP54	0.860558	1.04385e-07
200648_s_at	GLUL	0.860248	1.81926e-08
202351_at	ITGAV	0.859584	1.24908e-06
225369_at	ESAM	0.85948	0.00042696
223469_at	PGPEP1	0.859229	2.23532e-05
235275_at	BMP8B	0.858423	0.00137778
226443_at	FAM122A	0.857494	4.35718e-07
202625_at	LYN	0.857022	1.1913e-06
228159_at	WDFY2	0.856966	1.8346e-07
219060_at	WDYHV1	0.856154	4.97036e-08
228275_at	LINC00888	0.856144	7.44388e-05
230696_at	ATP2A1-AS1	0.856126	3.05854e-06
219888_at	SPAG4	0.855496	2.35013e-05
244293_at	UQCRB	0.854972	0.0016408
226106_at	RNF141	0.854638	8.86983e-07
227348_at	PARS2	0.854408	1.54791e-05
201719_s_at	EPB41L2	0.852539	1.91755e-08
200625_s_at	CAP1	0.852383	1.00455e-07
226045_at	FRS2	0.851235	2.34574e-07
217992_s_at	EFHD2	0.851234	1.0882e-05
219702_at	PLAC1	0.851078	0.00138314
218371_s_at	PSPC1	0.851066	7.38328e-05
206132_at	MCC	0.850062	0.000103197
205742_at	TNNI3	0.849798	5.90448e-06
203089_s_at	HTRA2	0.849566	1.04066e-05
213197_at	ASTN1	0.849492	4.8398e-06
1560228_at	SNAI3	0.848619	9.07581e-07
218786_at	NT5DC3	0.847964	5.52847e-05
226168_at	ZFAND2B	0.847778	0.00252375
206706_at	NTF3	0.847106	0.000756254
201963_at	ACSL1	0.846492	5.18037e-07
202500_at	DNAJB2	0.846132	1.09702e-05
229674_at	SERTAD4	0.84569	6.80551e-06
219055_at	SRBD1	0.845578	1.07714e-07
202893_at	UNC13B	0.844428	5.25009e-06
200697_at	HK1	0.843049	1.261e-06
224002_s_at	FKBP7	0.842868	1.89752e-06
212546_s_at	FRYL	0.842182	5.46272e-06
202880_s_at	CYTH1	0.841805	0.000280321
230151_at	SPRYD7	0.840807	0.000108087
1557132_at	WDR17	0.840695	1.4791e-05
235165_at	PARD6B	0.840649	4.9929e-05
205759_s_at	SULT2B1	0.840069	1.20082e-05
228314_at	LRRC8C	0.839956	4.0606e-05
216903_s_at	MICU1	0.839937	3.68751e-08
202101_s_at	RALB	0.839833	1.0229e-05
1556429_a_at	TBC1D31	0.839633	0.000547147
227864_s_at	MVB12A	0.838854	6.52486e-06
203186_s_at	S100A4	0.838496	0.000992023
208576_s_at	HIST1H3B	0.838106	0.0196398
218780_at	HOOK2	0.83801	2.27268e-05
204800_s_at	DHRS12	0.837862	4.2422e-05
207266_x_at	RBMS1	0.836978	1.12717e-06
206296_x_at	MAP4K1	0.836825	1.46682e-06
230257_s_at	TSEN15	0.836512	5.50839e-08
1554628_at	ZNF57	0.836063	4.23935e-05
228469_at	PPID	0.835684	8.54191e-07
207248_at	KCNA4	0.834927	4.72345e-05
209946_at	VEGFC	0.834682	4.22434e-05
225105_at	C12orf75	0.833937	4.45195e-07
229594_at	SPTY2D1	0.833531	1.17327e-06
232560_at	UROS	0.832569	2.65818e-06
219372_at	IFT81	0.83255	1.09627e-05
212508_at	MOAP1	0.832541	6.42512e-08
209666_s_at	CHUK	0.831571	3.6937e-06
204411_at	KIF21B	0.831486	1.00848e-06
212329_at	SCAP	0.831189	1.1439e-07
235245_at	TMEM92	0.831105	1.4744e-05
226633_at	RAB8B	0.830922	1.12987e-07
1558365_at	PGK1	0.830842	1.69322e-05
215236_s_at	PICALM	0.830828	4.41284e-07
242998_at	RDH12	0.830267	0.00350811
220671_at	NOCT	0.830087	1.97923e-06
239229_at	PHEX	0.829883	1.83846e-05
203141_s_at	AP3B1	0.829703	1.4251e-06
204458_at	PLA2G15	0.829221	0.000741419
241749_at	CAVIN4	0.82904	0.000711357
218442_at	TTC4	0.828072	2.12953e-07
225075_at	PDRG1	0.827285	1.80582e-07
1556913_a_at	GIT2	0.826608	3.23672e-06
223301_s_at	CCDC82	0.826269	1.39396e-05
223824_at	RNLS	0.825779	1.57275e-05
228967_at	EIF1	0.825283	3.4803e-08
1560814_a_at	CCDC32	0.824969	0.000513911
225800_at	JAZF1	0.824344	1.11801e-06
224215_s_at	DLL1	0.824259	0.000180051
239805_at	SLC13A2	0.824202	0.000943751
229888_at	C12orf60	0.823968	5.53485e-06
227819_at	LGR6	0.823871	7.86035e-06
205858_at	NGFR	0.82347	0.0167522
220144_s_at	ANKEF1	0.823244	2.53345e-05
224370_s_at	CAPS2	0.82322	0.00101747
266_s_at	CD24	0.82317	7.56238e-06
201444_s_at	ATP6AP2	0.823163	1.91279e-07
203786_s_at	TPD52L1	0.822782	0.000115087
244593_at	HID1	0.822722	2.76287e-06
207351_s_at	SH2D2A	0.82256	3.44385e-05
214138_at	ZNF79	0.821272	0.00210208
209029_at	COPS7A	0.820815	2.21932e-06
212271_at	MAPK1	0.820412	6.77224e-07
201980_s_at	RSU1	0.819979	3.17466e-05
205803_s_at	TRPC1	0.819978	6.99251e-06
218665_at	FZD4	0.819239	5.78684e-05
206731_at	CNKSR2	0.819125	0.000231377
219446_at	RIC8B	0.817592	0.000216692
219763_at	DENND1A	0.817545	2.12146e-06
206315_at	CRLF1	0.817126	0.000350008
226636_at	PLD1	0.816906	3.0024e-05
228892_at	SH3RF2	0.816723	7.32284e-06
227893_at	LINC00476	0.815917	0.00117202
242648_at	KLHL8	0.814663	1.38683e-07
201883_s_at	B4GALT1	0.814386	1.60532e-06
227108_at	STARD9	0.814291	0.00150601
231111_at	SCYL3	0.813664	5.36024e-06
37152_at	PPARD	0.813589	6.02809e-06
201192_s_at	PITPNA	0.813279	1.18653e-05
202570_s_at	DLGAP4	0.812695	0.000148109
219297_at	WDR44	0.812563	5.1491e-06
218377_s_at	RWDD2B	0.81174	1.14256e-06
37512_at	HSD17B6	0.811442	0.000179121
228831_s_at	GNG7	0.81058	0.000381813
228721_at	KRBOX1	0.810162	1.35949e-05
1569566_at	TBC1D1	0.809894	2.95581e-05
236331_at	CDKL2	0.809735	9.8738e-05
201118_at	PGD	0.809471	1.45333e-05
218319_at	PELI1	0.809408	2.87748e-06
244758_at	ZBED9	0.809288	0.00159694
231813_s_at	COG1	0.809264	2.5571e-05
218291_at	LAMTOR2	0.80923	1.65151e-07
217380_s_at	ADD3-AS1	0.80921	3.95592e-05
205500_at	C5	0.80896	0.00765518
218632_at	HECTD3	0.807987	0.00015289
220131_at	FXYD7	0.807952	6.41175e-06
212798_s_at	ANKMY2	0.807616	3.9572e-05
212865_s_at	COL14A1	0.806499	6.00446e-05
228799_at	NCK1-DT	0.806005	4.82749e-06
238574_at	SLC25A51	0.805646	1.53135e-05
232140_at	FRG1HP	0.804799	0.000674553
202027_at	TMEM184B	0.804522	4.75653e-06
220150_s_at	FAM184A	0.804405	7.77407e-07
207173_x_at	CDH11	0.804394	6.09461e-06
204000_at	GNB5	0.804354	3.79557e-06
224163_s_at	DMAP1	0.804331	1.87609e-05
221577_x_at	GDF15	0.803625	1.00962e-05
228816_at	ATP6AP1L	0.80347	8.15517e-06
217864_s_at	PIAS1	0.80282	7.17942e-08
209256_s_at	KLHDC10	0.802427	7.38972e-06
225390_s_at	KLF13	0.801707	1.58382e-06
1560654_at	FLJ37201	0.801332	0.000107248
218900_at	CNNM4	0.801127	0.00308468
230493_at	SHISA2	0.800776	0.000360171
203421_at	TP53I11	0.79885	9.94271e-06
202517_at	CRMP1	0.798625	0.000125318
215945_s_at	TRIM2	0.798516	2.67575e-06
225427_s_at	NAXE	0.79851	4.7484e-08
210002_at	GATA6	0.798366	0.0012923
235504_at	GREM2	0.797975	2.59507e-06
201365_at	OAZ2	0.797662	2.28107e-07
207535_s_at	NFKB2	0.797529	0.00447201
238974_at	C2orf69	0.7967	2.01465e-07
203787_at	SSBP2	0.795671	5.46702e-06
228971_at	SLC25A3	0.795384	9.06721e-06
212612_at	RCOR1	0.795349	1.45188e-07
212692_s_at	LRBA	0.795248	1.53959e-06
1568904_at	LINC01992	0.795091	0.0158387
224452_s_at	FAM220A	0.794747	1.17857e-05
206949_s_at	RUSC1	0.794697	1.4843e-06
226779_at	LMBRD2	0.794642	8.06138e-05
224225_s_at	ETV7	0.794627	8.16566e-05
212112_s_at	STX12	0.794105	1.34413e-06
229819_at	A1BG	0.793995	8.00653e-06
225579_at	PQLC3	0.793632	0.00265707
205191_at	RP2	0.793323	2.88286e-05
238513_at	PRRG4	0.792445	0.000250521
227371_at	BAIAP2L1	0.792431	0.000107613
226494_at	CAMSAP3	0.792003	3.05481e-06
238332_at	ANKRD29	0.791683	2.34337e-05
207231_at	DZIP3	0.791432	8.09147e-06
226873_at	MINDY2	0.790944	5.69425e-06
235560_at	NOVA2	0.79071	5.29524e-07
214519_s_at	RLN2	0.790328	3.46761e-05
225014_at	SMIM20	0.790298	2.06105e-06
227002_at	FAM78A	0.790295	0.00135272
205097_at	SLC26A2	0.7901	1.05299e-06
1552390_a_at	ERICH5	0.789934	7.56015e-05
228463_at	FOXA3	0.789732	7.42157e-05
49452_at	ACACB	0.789553	0.00383004
224147_at	PARPBP	0.789483	0.000170217
228777_at	KBTBD3	0.789445	0.000269518
203765_at	GCA	0.788773	3.49723e-05
233085_s_at	NABP1	0.788768	1.73052e-05
205678_at	AP3B2	0.788599	2.67269e-05
1555602_a_at	ELAVL3	0.788471	0.00165636
239015_at	THAP7-AS1	0.78763	0.00257808
212829_at	PIP4K2A	0.785972	0.000545658
206227_at	CILP	0.784735	7.85628e-06
226370_at	KLHL15	0.784607	1.39889e-06
207949_s_at	ICA1	0.784211	8.53427e-06
242871_at	PAQR5	0.783629	1.77051e-05
213530_at	RAB3GAP1	0.783598	2.11797e-07
203143_s_at	KIAA0040	0.782806	4.40998e-05
227809_at	ZC3H6	0.782495	0.0014007
228966_at	PANK2	0.781815	0.000166585
227500_at	FBXL18	0.781675	0.000245403
221752_at	SSH1	0.781324	8.62994e-06
201971_s_at	ATP6V1A	0.781321	6.06502e-06
203918_at	PCDH1	0.780631	0.000103489
228503_at	RPS6KA6	0.780481	0.000288125
227829_at	LARGE2	0.780317	9.62387e-05
203334_at	DHX8	0.780162	4.00745e-06
213424_at	KIAA0895	0.780065	8.94154e-06
207625_s_at	CBFA2T2	0.779233	0.000147502
218020_s_at	ZFAND3	0.779042	3.5995e-06
224583_at	COTL1	0.778642	7.25248e-08
225129_at	CPNE2	0.778554	9.94545e-05
230300_at	PSMA5	0.778533	2.28862e-05
227365_at	ATCAY	0.778215	2.21392e-05
203546_at	IPO13	0.777402	0.000216847
1559483_at	PROX1-AS1	0.777259	3.77843e-05
202796_at	SYNPO	0.777153	2.91541e-05
213934_s_at	ZNF23	0.776986	4.26893e-05
218214_at	ATG101	0.77679	4.47575e-07
225177_at	RAB11FIP1	0.776442	2.85986e-05
204552_at	INPP4A	0.77615	0.000167055
225045_at	CCDC88A	0.776013	1.62842e-07
35148_at	TJP3	0.775724	0.00048358
218307_at	RSAD1	0.775683	1.66924e-05
205160_at	PEX11A	0.775668	4.44589e-05
223492_s_at	LRRFIP1	0.775548	0.000375246
220775_s_at	UEVLD	0.775455	0.000421771
225093_at	UTRN	0.775344	0.000268161
227482_at	ADCK1	0.775339	0.000174372
227787_s_at	MED30	0.775193	5.33584e-07
226064_s_at	DGAT2	0.774962	0.0136654
218051_s_at	NT5DC2	0.774518	2.63891e-06
227318_at	TMEM178B	0.774157	0.00017781
1554185_at	LOC554206	0.773895	0.000547783
228715_at	ZCCHC12	0.773813	0.00153364
207122_x_at	SULT1A2	0.773513	2.3023e-05
[truncated: 7,978 more rows]
